# Supplementary material
Source: publisher figshare collection journal article supplement (https://asha.figshare.com/ndownloader/files/15738887)
Supplement: Supplementary file 1 [file 15738887]

## Sheet: Blad1
Supplemental material, Witte & Köbler, “Linguistic Materials and Metrics for the Creation of Well-Controlled Swedish Speech Perception Tests,” JSLHR, https://doi.org/10.1044/2019_JSLHR-S-18-0454
	Supplemental Material S3. Swedish position-specific biphone probability (PSBP) data and standardized position-specific bi-phone probability (S-PSBP) data
	Position	Biphone	Positional-specific biphone probability (PSBP)	Standardized positional-specific biphone probability (S-PSBP)
	0	a b	0.000563306	-0.1785
	0	ɑ b	3.53546e-05	-0.428188
	0	a bː	0.000122114	-0.387156
	0	a ɔ	1.41552e-05	-0.438214
	0	a d	0.00111526	0.0825416
	0	ɑ d	1.55656e-05	-0.437547
	0	a dː	3.46955e-05	-0.4285
	0	a ɖ	3.88044e-05	-0.426557
	0	a e̞	4.82207e-06	-0.442628
	0	ɑ e̞	6.53886e-06	-0.441817
	0	a f	0.000954066	0.00630518
	0	a fː	0.000234203	-0.334145
	0	a ɡ	0.000631625	-0.146189
	0	ɑ ɡ	5.04335e-06	-0.442524
	0	a ɡː	3.0616e-05	-0.43043
	0	a h	1.33964e-05	-0.438573
	0	a ɧ	7.42821e-05	-0.409778
	0	a ɧː	2.11049e-05	-0.434928
	0	ɑ i	5.02119e-06	-0.442534
	0	a ʝ	4.50191e-05	-0.423618
	0	a ʝː	0.00014859	-0.374635
	0	a k	0.0017903	0.401793
	0	a kː	0.00116807	0.107517
	0	a l	0.00267409	0.81977
	0	ɑ l	1.07537e-05	-0.439823
	0	ɑ ɭ	3.38957e-06	-0.443306
	0	a lː	0.00239617	0.688331
	0	a m	0.00172602	0.371391
	0	a ɱ	2.52588e-05	-0.432963
	0	ɑ m	7.03814e-06	-0.44158
	0	a mː	0.00062103	-0.1512
	0	a ɱː	0.000688647	-0.119222
	0	a n	0.00307587	1.00979
	0	a ɳ	1.24832e-05	-0.439005
	0	ɑ ɳ	1.06631e-06	-0.444405
	0	a nː	0.00572257	2.26151
	0	a ŋ	0.000540071	-0.189489
	0	a ŋː	0.00109639	0.0736157
	0	a p	0.00158287	0.303693
	0	ɑ p	4.9204e-06	-0.442582
	0	a pː	8.36693e-05	-0.405339
	0	a r	0.00191956	0.462925
	0	ɑ r	1.59947e-06	-0.444153
	0	a rː	0.00367205	1.29174
	0	a s	0.00124827	0.145447
	0	a ʂ	7.84057e-05	-0.407828
	0	ɑ s	1.06631e-06	-0.444405
	0	a sː	0.000664014	-0.130871
	0	a ʂː	5.26794e-05	-0.419995
	0	a t	0.00119576	0.120612
	0	a ʈ	0.000518356	-0.199759
	0	ɑ t	1.75308e-05	-0.436618
	0	a tː	0.000175227	-0.362037
	0	a ʈː	3.04212e-05	-0.430522
	0	a v	0.000349577	-0.279581
	0	ɑ v	1.71292e-05	-0.436808
	0	a vː	1.14554e-05	-0.439491
	0	ɑː b	7.9127e-05	-0.407487
	0	ɑː d	0.000272776	-0.315903
	0	ɑː e̞	1.91535e-05	-0.435851
	0	ɑː ɛ̝	1.45919e-05	-0.438008
	0	ɑː f	3.85067e-05	-0.426698
	0	ɑː ɡ	8.94017e-05	-0.402628
	0	ɑː h	5.42216e-06	-0.442345
	0	ɑː i	2.58413e-05	-0.432688
	0	ɑː k	3.48207e-05	-0.428441
	0	ɑː l	0.000523421	-0.197363
	0	ɑː ɭ	3.8905e-05	-0.426509
	0	ɑː m	3.17517e-05	-0.429892
	0	ɑː ɱ	1.59901e-05	-0.437347
	0	ɑː n	0.000225907	-0.338069
	0	ɑː ɳ	0.000109309	-0.393212
	0	ɑː p	0.000185163	-0.357338
	0	ɑː r	0.000225714	-0.33816
	0	ɑː s	0.000162412	-0.368098
	0	ɑː ʂ	1.02112e-05	-0.44008
	0	ɑː t	4.24159e-05	-0.424849
	0	ɑː ʈ	0.000244139	-0.329446
	0	ɑː v	0.0105099	4.52564
	0	a͡u d	8.15578e-05	-0.406337
	0	a͡u ɡ	7.67789e-05	-0.408597
	0	a͡u k	0.000266724	-0.318765
	0	a͡u l	4.28892e-06	-0.442881
	0	a͡u r	3.6059e-05	-0.427855
	0	a͡u s	9.90763e-05	-0.398052
	0	a͡u t	0.000403856	-0.25391
	0	a͡uː d	3.22156e-05	-0.429673
	0	a͡uː e̞	7.36148e-06	-0.441427
	0	a͡uː ɡ	2.78287e-05	-0.431748
	0	a͡uː k	1.79374e-05	-0.436426
	0	a͡uː l	2.47704e-05	-0.433194
	0	a͡uː r	2.70791e-05	-0.432102
	0	a͡uː t	5.98387e-05	-0.416609
	0	a͡uː v	3.44389e-06	-0.44328
	0	b a	0.00655749	2.65638
	0	b ɑ	7.78635e-05	-0.408084
	0	b ɑː	0.00521365	2.02083
	0	b a͡u	1.69422e-05	-0.436896
	0	b a͡uː	4.93739e-05	-0.421558
	0	b ɔ	0.00448595	1.67667
	0	b e	2.3436e-05	-0.433825
	0	b e̞	0.0123676	5.40419
	0	b eː	0.00117917	0.112765
	0	b ɛ	1.40747e-05	-0.438253
	0	b ɛ̝	0.00312326	1.0322
	0	b ɛː	0.000955921	0.0071825
	0	b i	0.000294124	-0.305807
	0	b ɪ	0.00275971	0.860263
	0	b iː	0.00338332	1.15519
	0	b ʝ	0.00114974	0.0988472
	0	b l	0.0071929	2.95689
	0	b o	4.42477e-06	-0.442816
	0	b ɵ	0.00263732	0.802383
	0	b oː	0.000951767	0.00521797
	0	b r	0.0099016	4.23794
	0	b u	6.14927e-05	-0.415827
	0	b ʉ	0.000370106	-0.269872
	0	b ʉ̞	0.000144632	-0.376507
	0	b ʊ	0.00173679	0.376483
	0	b uː	0.00351061	1.21539
	0	b ʉː	0.000949595	0.00419078
	0	b y	7.77258e-05	-0.40815
	0	b ʏ	0.00150492	0.266827
	0	b yː	0.000575766	-0.172607
	0	b ø	3.77305e-06	-0.443125
	0	b ø̞	0.000824715	-0.0548696
	0	b øː	0.000663921	-0.130916
	0	ɕ a	0.000393502	-0.258807
	0	ɕ ɑː	0.000258865	-0.322482
	0	ɕ a͡uː	3.1493e-06	-0.44342
	0	ɔ b	0.000322666	-0.292308
	0	ɔ bː	2.34339e-05	-0.433826
	0	ɕ ɔ	0.000305877	-0.300248
	0	ɔ d	8.01026e-06	-0.441121
	0	ɔ dː	3.51156e-05	-0.428302
	0	ɔ ɖ	0.000101383	-0.396961
	0	ɕ e	1.06631e-06	-0.444405
	0	ɕ e̞	0.000300843	-0.302629
	0	ɕ eː	0.000324042	-0.291657
	0	ɕ ɛ	1.00112e-05	-0.440174
	0	ɕ ɛ̝	0.00301546	0.981219
	0	ɕ ɛː	0.00170842	0.36307
	0	ɔ f	0.000246019	-0.328557
	0	ɔ fː	0.00025789	-0.322943
	0	ɕ i	0.000142431	-0.377548
	0	ɕ ɪ	0.000912727	-0.0132456
	0	ɕ iː	0.000641803	-0.141376
	0	ɔ ʝ	1.20064e-05	-0.439231
	0	ɔ ʝː	6.19524e-05	-0.415609
	0	ɔ k	0.000338262	-0.284932
	0	ɔ kː	0.000139082	-0.379132
	0	ɔ l	7.01768e-05	-0.41172
	0	ɔ lː	0.0013241	0.181307
	0	ɔ m	0.000226513	-0.337782
	0	ɔ mː	0.00348235	1.20203
	0	ɔ n	5.16977e-05	-0.420459
	0	ɔ ɳ	3.01759e-05	-0.430638
	0	ɔ nː	4.57713e-06	-0.442744
	0	ɔ ŋ	3.44577e-05	-0.428613
	0	ɔ ŋː	0.000514274	-0.201689
	0	ɕ ɵ	6.41753e-06	-0.441874
	0	ɕ oː	5.33285e-05	-0.419688
	0	ɔ p	0.00111256	0.0812655
	0	ɔ pː	8.03128e-05	-0.406926
	0	ɔ r	0.000885643	-0.0260546
	0	ɔ rː	0.000264298	-0.319912
	0	ɔ s	0.000191147	-0.354508
	0	ɔ ʂ	2.97569e-05	-0.430836
	0	ɔ sː	0.000304231	-0.301027
	0	ɔ t	0.000117205	-0.389478
	0	ɔ ʈ	0.000139451	-0.378957
	0	ɔ tː	0.00021903	-0.341321
	0	ɕ ʉ	6.20383e-05	-0.415569
	0	ɕ ʉ̞	4.60467e-06	-0.442731
	0	ɕ ʊ	2.73536e-05	-0.431972
	0	ɕ uː	0.000106083	-0.394738
	0	ɕ ʉː	0.00076697	-0.0821796
	0	ɔ v	3.25679e-05	-0.429506
	0	ɔ vː	1.29383e-05	-0.43879
	0	ɕ ʏ	0.00109339	0.0721979
	0	ɕ yː	0.0004338	-0.239749
	0	ɕ ø	4.10304e-05	-0.425504
	0	ɕ ø̞	0.00120247	0.123785
	0	ɕ øː	0.00146248	0.246753
	0	d a	0.0026401	0.803697
	0	d ɑ	4.09705e-05	-0.425532
	0	d ɑː	0.00304737	0.996311
	0	d a͡uː	2.31408e-05	-0.433965
	0	d ɔ	0.00162486	0.323548
	0	d e	6.89426e-05	-0.412303
	0	d e̞	0.00490069	1.87281
	0	d eː	0.00125538	0.14881
	0	d ɛ	7.14574e-05	-0.411114
	0	d ɛ̝	0.000934345	-0.00302126
	0	d ɛː	0.000173358	-0.362922
	0	d i	0.000838378	-0.0484081
	0	d ɪ	0.00462797	1.74384
	0	d iː	0.000682797	-0.121988
	0	d ʝ	5.47874e-05	-0.418998
	0	d n	3.32093e-06	-0.443338
	0	d ɵ	0.00191088	0.458819
	0	d oː	0.000559881	-0.18012
	0	d r	0.00474166	1.7976
	0	d u	1.27592e-05	-0.438875
	0	d ʉ	0.000214897	-0.343276
	0	d ʉ̞	0.000101752	-0.396787
	0	d ʊ	0.00094704	0.00298267
	0	d uː	0.00046134	-0.226724
	0	d ʉː	0.00060792	-0.157401
	0	d v	0.000264581	-0.319779
	0	d y	2.16381e-05	-0.434676
	0	d ʏ	0.000671972	-0.127108
	0	d yː	0.00060407	-0.159221
	0	d ø	5.57432e-06	-0.442273
	0	d ø̞	0.00113666	0.0926603
	0	d øː	0.000609597	-0.156607
	0	e b	1.06631e-06	-0.444405
	0	e̞ b	1.11466e-05	-0.439637
	0	e d	6.32876e-06	-0.441916
	0	e̞ d	9.57667e-05	-0.399617
	0	e e	1.10015e-05	-0.439706
	0	e e̞	1.41748e-05	-0.438205
	0	e ɛ̝	7.82552e-06	-0.441208
	0	e̞ f	0.000378292	-0.266
	0	e ɡ	7.09891e-05	-0.411336
	0	e̞ ɡ	0.000119999	-0.388157
	0	e̞ h	9.18565e-06	-0.440565
	0	e̞ ʝ	0.000150647	-0.373662
	0	e k	1.25296e-05	-0.438983
	0	e̞ k	0.00384135	1.37181
	0	e l	1.06631e-06	-0.444405
	0	e̞ l	0.00187821	0.443369
	0	e̞ m	0.000750038	-0.0901873
	0	e̞ ɱ	6.96842e-06	-0.441613
	0	e n	5.52687e-06	-0.442295
	0	e̞ n	0.00102745	0.0410127
	0	e̞ ŋ	3.93649e-05	-0.426292
	0	e̞ oː	2.3734e-05	-0.433684
	0	e̞ p	0.00036704	-0.271322
	0	e r	2.89101e-05	-0.431236
	0	e̞ r	0.00033532	-0.286323
	0	e s	2.92802e-06	-0.443524
	0	e̞ s	0.000636648	-0.143814
	0	e̞ t	0.000667615	-0.129168
	0	e ʊ	1.00273e-05	-0.440167
	0	e̞ ʊ	4.79841e-06	-0.44264
	0	e v	5.77562e-06	-0.442177
	0	e̞ v	0.000411949	-0.250082
	0	eː b	2.91424e-05	-0.431126
	0	eː ɔ	5.5032e-06	-0.442306
	0	eː ɕ	6.76482e-06	-0.44171
	0	eː d	0.000400973	-0.255273
	0	eː e	6.13651e-06	-0.442007
	0	eː e̞	7.89301e-05	-0.40758
	0	eː f	1.82984e-05	-0.436255
	0	eː ɡ	0.000646953	-0.13894
	0	eː k	0.000654364	-0.135435
	0	eː l	0.00100999	0.0327558
	0	eː ɭ	1.71135e-05	-0.436815
	0	eː m	0.000205292	-0.347819
	0	eː ɱ	0.000295435	-0.305187
	0	eː n	0.0011553	0.101475
	0	eː ɳ	8.6211e-06	-0.440832
	0	eː ŋ	0.000178708	-0.360391
	0	eː p	4.74928e-05	-0.422448
	0	eː r	0.000688591	-0.119248
	0	eː s	5.22324e-05	-0.420206
	0	eː ʂ	0.000254906	-0.324354
	0	eː t	0.000120377	-0.387978
	0	eː ʈ	2.62682e-05	-0.432486
	0	eː ʉ	0.000108121	-0.393774
	0	eː v	0.000302331	-0.301925
	0	e͡ʉ f	5.5219e-05	-0.418794
	0	e͡ʉ ɧ	1.57238e-05	-0.437473
	0	e͡ʉ k	2.98941e-05	-0.430771
	0	e͡ʉ m	4.79841e-06	-0.44264
	0	e͡ʉ n	1.98389e-05	-0.435526
	0	e͡ʉ r	0.000282156	-0.311467
	0	e͡ʉ s	4.79841e-06	-0.44264
	0	e͡ʉ t	8.02101e-06	-0.441116
	0	e͡ʉː r	1.82017e-05	-0.436301
	0	ɛ̝ bː	5.82534e-05	-0.417359
	0	ɛ̝ dː	0.000102658	-0.396358
	0	ɛ̝ fː	0.00205467	0.526821
	0	ɛ ɡ	1.52749e-05	-0.437685
	0	ɛ̝ ɡ	4.57713e-06	-0.442744
	0	ɛ̝ ɡː	0.000449113	-0.232506
	0	ɛ̝ ʝː	0.000212982	-0.344182
	0	ɛ̝ kː	0.000918474	-0.0105277
	0	ɛ̝ l	3.29983e-05	-0.429303
	0	ɛ̝ ɭ	1.91135e-06	-0.444005
	0	ɛ̝ lː	0.00205819	0.528487
	0	ɛ̝ m	1.47416e-05	-0.437937
	0	ɛ̝ mː	0.000497928	-0.20942
	0	ɛ̝ ɳ	6.79229e-06	-0.441697
	0	ɛ̝ nː	0.000673292	-0.126483
	0	ɛ̝ ŋ	3.39087e-05	-0.428872
	0	ɛ̝ ŋː	0.00103287	0.0435742
	0	ɛ̝ pː	0.000258747	-0.322538
	0	ɛ r	6.95703e-05	-0.412007
	0	ɛ̝ r	1.3828e-05	-0.438369
	0	ɛ̝ rː	0.000361394	-0.273992
	0	ɛ̝ sː	0.000495853	-0.210401
	0	ɛ̝ ʂː	1.72387e-05	-0.436756
	0	ɛ̝ tː	0.000408666	-0.251635
	0	ɛ̝ ʈː	0.000140438	-0.378491
	0	ɛ̝ vː	3.29956e-05	-0.429304
	0	ɛː b	1.03046e-05	-0.440036
	0	ɛː d	0.000152588	-0.372744
	0	ɛː ɖ	3.71998e-06	-0.44315
	0	ɛː ɡ	0.000330386	-0.288657
	0	ɛː k	9.98614e-06	-0.440186
	0	ɛː l	5.92675e-06	-0.442106
	0	ɛː ɭ	0.000108278	-0.3937
	0	ɛː n	3.53448e-06	-0.443237
	0	ɛː ɳ	6.28716e-05	-0.415175
	0	ɛː r	0.000326969	-0.290273
	0	ɛː ʂ	1.0975e-05	-0.439719
	0	ɛː t	0.000155888	-0.371184
	0	ɛː v	0.000239942	-0.331431
	0	f a	0.00605496	2.41871
	0	f ɑ	2.5796e-05	-0.432709
	0	f ɑː	0.00137568	0.205703
	0	f a͡u	1.49284e-05	-0.437849
	0	f a͡uː	2.96383e-05	-0.430892
	0	f ɔ	0.00450321	1.68483
	0	f e	4.79841e-06	-0.44264
	0	f e̞	0.000799269	-0.066904
	0	f eː	0.00129842	0.169163
	0	f ɛ̝	0.0038564	1.37893
	0	f ɛː	0.00086123	-0.0376006
	0	f i	3.33353e-05	-0.429143
	0	f ɪ	0.0056189	2.21249
	0	f iː	0.00151409	0.27116
	0	f ʝ	0.00165918	0.339782
	0	f l	0.00700922	2.87002
	0	f n	0.000315864	-0.295525
	0	f o	1.38078e-05	-0.438379
	0	f ɵ	0.00188966	0.448783
	0	f oː	0.00117081	0.108811
	0	f r	0.0111458	4.82636
	0	f u	5.79124e-05	-0.41752
	0	f ʉ	9.7193e-05	-0.398943
	0	f ʉ̞	6.35372e-05	-0.41486
	0	f ʊ	0.00162145	0.321935
	0	f uː	0.0018489	0.429507
	0	f ʉː	0.000270762	-0.316855
	0	f y	0.000108198	-0.393738
	0	f ʏ	0.000599522	-0.161372
	0	f yː	0.000676945	-0.124756
	0	f ø	7.45935e-05	-0.409631
	0	f ø̞	0.0172571	7.71662
	0	f øː	0.00529276	2.05824
	0	ɡ a	0.00317423	1.0563
	0	ɡ ɑ	7.10267e-06	-0.44155
	0	ɡ ɑː	0.00184456	0.427456
	0	ɡ a͡uː	1.88237e-05	-0.436007
	0	ɡ ɔ	0.00154143	0.284093
	0	ɡ e	2.79899e-05	-0.431672
	0	ɡ e̞	0.000183594	-0.358081
	0	ɡ eː	9.92216e-05	-0.397983
	0	ɡ ɛ̝	0.000244064	-0.329482
	0	ɡ ɛː	4.06067e-05	-0.425705
	0	ɡ ɪ	0.000267953	-0.318184
	0	ɡ iː	2.25275e-05	-0.434255
	0	ɡ l	0.00407191	1.48085
	0	ɡ n	0.000762669	-0.0842138
	0	ɡ o	3.90734e-05	-0.42643
	0	ɡ ɵ	0.00323182	1.08354
	0	ɡ oː	0.000703657	-0.112123
	0	ɡ r	0.0118872	5.177
	0	ɡ u	6.54803e-05	-0.413941
	0	ɡ ʉ	0.000141984	-0.377759
	0	ɡ ʉ̞	0.000128009	-0.384369
	0	ɡ ʊ	0.000366598	-0.271531
	0	ɡ uː	0.000796642	-0.0681467
	0	ɡ ʉː	0.000888738	-0.0245909
	0	ɡ ʏ	2.548e-05	-0.432859
	0	ɡ yː	4.78016e-06	-0.442648
	0	ɡ ø̞	7.86666e-06	-0.441189
	0	ɡ øː	1.98129e-05	-0.435539
	0	h a	0.00988604	4.23058
	0	h ɑ	6.94376e-05	-0.412069
	0	h ɑː	0.00178495	0.39926
	0	h a͡u	1.06631e-06	-0.444405
	0	h a͡uː	5.00355e-05	-0.421245
	0	h ɔ	0.00209022	0.543636
	0	h e	0.000122599	-0.386927
	0	h e̞	0.000839371	-0.0479385
	0	h eː	0.00208883	0.542977
	0	h e͡ʉ	5.95531e-06	-0.442093
	0	h ɛ	8.07249e-05	-0.406731
	0	h ɛ̝	0.00813275	3.40138
	0	h ɛː	0.00124055	0.141796
	0	h ɪ	0.00190599	0.456508
	0	h iː	0.000195405	-0.352494
	0	h o	5.73173e-05	-0.417801
	0	h ɵ	0.00184692	0.428571
	0	h oː	0.00221728	0.603725
	0	h u	9.75707e-05	-0.398764
	0	h ʉ	0.000212407	-0.344454
	0	h ʉ̞	0.000149327	-0.374287
	0	h ʊ	0.000616057	-0.153552
	0	h uː	0.00148945	0.259508
	0	h ʉː	0.00342573	1.17525
	0	h y	6.14342e-05	-0.415854
	0	h ʏ	0.00119044	0.118095
	0	h yː	0.000779387	-0.076307
	0	h ø	4.29959e-05	-0.424575
	0	h ø̞	0.00150744	0.268018
	0	h øː	0.00316004	1.0496
	0	ɧ a	0.00162755	0.324823
	0	ɧ ɑː	0.000112217	-0.391837
	0	ɧ a͡uː	1.59947e-06	-0.444153
	0	ɧ ɔ	0.00048338	-0.2163
	0	ɧ e̞	0.000593809	-0.164074
	0	ɧ eː	0.000975966	0.0166628
	0	ɧ ɛ	1.22043e-05	-0.439137
	0	ɧ ɛ̝	0.00331808	1.12434
	0	ɧ ɛː	0.00127778	0.159403
	0	ɧ ɪ	0.00160531	0.314305
	0	ɧ iː	0.00132621	0.182306
	0	ɧ o	4.26525e-06	-0.442892
	0	ɧ ɵ	0.000431968	-0.240615
	0	ɧ oː	0.000109703	-0.393026
	0	ɧ ʉ	8.17552e-05	-0.406244
	0	ɧ ʉ̞	8.56362e-05	-0.404408
	0	ɧ ʊ	0.000590712	-0.165539
	0	ɧ uː	0.000102554	-0.396407
	0	ɧ ʉː	0.00224628	0.617441
	0	ɧ ʏ	0.00135217	0.194582
	0	ɧ yː	0.000154538	-0.371822
	0	ɧ ø	1.16741e-05	-0.439388
	0	ɧ ø̞	0.000454737	-0.229847
	0	ɧ øː	0.00218188	0.586985
	0	ɪ a	2.08509e-05	-0.435048
	0	i ɑ	2.30426e-06	-0.443819
	0	i b	7.49366e-06	-0.441365
	0	ɪ b	4.12947e-05	-0.425379
	0	ɪ bː	1.00672e-05	-0.440148
	0	i d	1.70824e-05	-0.43683
	0	ɪ d	0.00106738	0.0598945
	0	ɪ dː	3.50816e-05	-0.428318
	0	i e̞	2.32129e-05	-0.433931
	0	ɪ f	0.000113701	-0.391135
	0	ɪ ɡ	0.00013903	-0.379157
	0	ɪ ɡː	3.82269e-06	-0.443101
	0	ɪ h	9.23853e-05	-0.401216
	0	ɪ ʝ	0.000354988	-0.277022
	0	ɪ k	0.000159688	-0.369387
	0	ɪ kː	0.000152729	-0.372678
	0	ɪ l	0.000367988	-0.270874
	0	ɪ lː	0.000381408	-0.264527
	0	ɪ m	0.00126817	0.154856
	0	ɪ ɱ	0.00189577	0.451671
	0	ɪ mː	0.00126299	0.152405
	0	ɪ ɱː	0.00175262	0.383972
	0	ɪ n	0.0054796	2.1466
	0	ɪ nː	0.00724296	2.98056
	0	ɪ ŋ	0.00055846	-0.180792
	0	ɪ ŋː	0.001364	0.200177
	0	i oː	1.91135e-06	-0.444005
	0	ɪ oː	1.86137e-05	-0.436106
	0	ɪ pː	5.31409e-06	-0.442396
	0	ɪ r	0.000438276	-0.237631
	0	ɪ rː	0.000148648	-0.374607
	0	i s	7.72151e-05	-0.408391
	0	ɪ s	0.000473506	-0.22097
	0	ɪ sː	9.55632e-05	-0.399714
	0	ɪ ʂː	2.68067e-05	-0.432231
	0	i t	4.47442e-06	-0.442793
	0	ɪ t	0.000134597	-0.381253
	0	i u	7.40639e-06	-0.441406
	0	i v	9.74777e-06	-0.440299
	0	ɪ v	4.39683e-05	-0.424115
	0	ɪ øː	7.93355e-06	-0.441157
	0	iː a	9.22182e-05	-0.401295
	0	iː b	4.1107e-05	-0.425468
	0	iː d	0.000779592	-0.0762101
	0	iː e̞	5.01893e-06	-0.442535
	0	iː f	3.58829e-05	-0.427939
	0	iː ɡ	0.000100376	-0.397437
	0	iː h	0.000109055	-0.393333
	0	iː ɧ	2.02599e-05	-0.435327
	0	iː k	8.63569e-05	-0.404068
	0	iː l	0.000150982	-0.373504
	0	iː ɭ	7.53165e-06	-0.441347
	0	iː m	1.28543e-05	-0.43883
	0	iː n	2.01582e-05	-0.435375
	0	iː p	2.06622e-05	-0.435137
	0	iː r	6.03584e-05	-0.416363
	0	iː s	0.00141396	0.223805
	0	iː ʂ	5.6023e-06	-0.442259
	0	iː t	2.42897e-05	-0.433421
	0	iː v	0.000165729	-0.36653
	0	ʝ a	0.00130544	0.172481
	0	ʝ ɑ	8.38299e-05	-0.405263
	0	ʝ ɑː	0.000611715	-0.155606
	0	ʝ a͡uː	1.06631e-06	-0.444405
	0	ʝ ɔ	0.000758688	-0.0860965
	0	ʝ e	0.000203066	-0.348871
	0	ʝ e̞	0.0013038	0.171706
	0	ʝ eː	0.00247059	0.723526
	0	ʝ ɛ	3.27242e-05	-0.429432
	0	ʝ ɛ̝	0.00502142	1.92991
	0	ʝ ɛː	0.00227416	0.63063
	0	ʝ i	2.4952e-05	-0.433108
	0	ʝ ɪ	0.00144431	0.238159
	0	ʝ iː	0.000508663	-0.204343
	0	ʝ ɵ	0.000812601	-0.0605987
	0	ʝ oː	0.000102991	-0.396201
	0	ʝ u	1.91428e-05	-0.435856
	0	ʝ ʉ	0.00070549	-0.111256
	0	ʝ ʉ̞	3.00179e-05	-0.430712
	0	ʝ ʊ	0.000553064	-0.183344
	0	ʝ uː	0.00178206	0.397893
	0	ʝ ʉː	0.00497889	1.9098
	0	ʝ y	6.18852e-06	-0.441982
	0	ʝ ʏ	0.00112359	0.0864788
	0	ʝ yː	5.63279e-05	-0.418269
	0	ʝ ø	9.08474e-05	-0.401944
	0	ʝ ø̞	0.000445825	-0.234062
	0	ʝ øː	0.000634277	-0.144935
	0	k a	0.0120945	5.27506
	0	k ɑ	0.000279091	-0.312916
	0	k ɑː	0.00217426	0.583382
	0	k a͡u	4.29416e-05	-0.4246
	0	k a͡uː	0.000138751	-0.379288
	0	k ɔ	0.0164417	7.33101
	0	k e̞	0.000175684	-0.361821
	0	k eː	4.05132e-05	-0.425749
	0	k e͡ʉː	1.06631e-06	-0.444405
	0	k ɛ̝	0.000483209	-0.216381
	0	k ɛː	4.29271e-05	-0.424607
	0	k ɪ	0.000623277	-0.150138
	0	k iː	0.000133682	-0.381686
	0	k l	0.0073051	3.00995
	0	k m	1.36906e-05	-0.438434
	0	k n	0.00353969	1.22914
	0	k o	6.49905e-05	-0.414173
	0	k ɵ	0.00425939	1.56952
	0	k oː	0.00155796	0.291911
	0	k r	0.00997725	4.27372
	0	k s	6.55769e-05	-0.413895
	0	k u	2.90839e-05	-0.431154
	0	k ʉ	0.000570951	-0.174885
	0	k ʉ̞	0.000108321	-0.39368
	0	k ʊ	0.00174409	0.37994
	0	k uː	0.00104549	0.0495429
	0	k ʉː	0.000679	-0.123784
	0	k v	0.00387928	1.38975
	0	k ʏ	6.64461e-05	-0.413484
	0	k yː	2.02069e-05	-0.435352
	0	k ø̞	3.05641e-05	-0.430454
	0	k øː	0.000343394	-0.282505
	0	l a	0.00554805	2.17898
	0	l ɑ	0.000123826	-0.386347
	0	l ɑː	0.00241128	0.695476
	0	l a͡u	1.85023e-05	-0.436159
	0	l a͡uː	4.03927e-05	-0.425806
	0	l ɔ	0.0027653	0.862908
	0	l e	9.8802e-05	-0.398182
	0	l e̞	0.000932189	-0.00404096
	0	l eː	0.00271561	0.839406
	0	l e͡ʉ	2.04685e-05	-0.435229
	0	l ɛ	3.57794e-05	-0.427988
	0	l ɛ̝	0.00322183	1.07882
	0	l ɛː	0.00282705	0.892112
	0	l i	6.38593e-05	-0.414707
	0	l ɪ	0.00489204	1.86872
	0	l iː	0.00260689	0.787988
	0	l o	1.95779e-05	-0.43565
	0	l ɵ	0.00317523	1.05678
	0	l oː	0.00171789	0.367547
	0	l u	5.96724e-06	-0.442087
	0	l ʉ	0.00015172	-0.373155
	0	l ʉ̞	3.26475e-05	-0.429469
	0	l ʊ	0.00104416	0.0489122
	0	l uː	0.000543721	-0.187763
	0	l ʉː	0.000553945	-0.182927
	0	l ʏ	0.00140072	0.217545
	0	l yː	0.000461676	-0.226565
	0	l ø	7.01627e-06	-0.441591
	0	l ø̞	0.000550824	-0.184403
	0	l øː	0.00243371	0.706086
	0	m a	0.0110247	4.76909
	0	m ɑ	4.03301e-05	-0.425835
	0	m ɑː	0.00267819	0.821711
	0	m a͡u	4.97182e-05	-0.421395
	0	m a͡uː	5.61863e-05	-0.418336
	0	m ɔ	0.0032534	1.09375
	0	m e	3.0939e-05	-0.430277
	0	m e̞	0.00235048	0.666724
	0	m eː	0.00310843	1.02518
	0	m ɛ	1.88915e-05	-0.435975
	0	m ɛ̝	0.00305806	1.00136
	0	m ɛː	0.000506065	-0.205572
	0	m ɪ	0.00667783	2.71329
	0	m iː	0.00119594	0.120696
	0	m ʝ	0.00096962	0.0136614
	0	m l	4.38725e-06	-0.442834
	0	m o	4.828e-05	-0.422076
	0	m ɵ	0.00187556	0.442117
	0	m oː	0.00193069	0.468189
	0	m u	1.45052e-05	-0.438049
	0	m ʉ	0.000977778	0.0175197
	0	m ʉ̞	0.000184886	-0.357469
	0	m ʊ	0.0021821	0.587091
	0	m uː	0.00340339	1.16468
	0	m ʉː	0.000493576	-0.211478
	0	m y	2.17601e-05	-0.434618
	0	m ʏ	0.000871888	-0.0325598
	0	m yː	0.000407167	-0.252344
	0	m ø	4.93563e-06	-0.442575
	0	m ø̞	0.00103635	0.0452217
	0	m øː	0.000789806	-0.0713796
	0	n a	0.00437651	1.62491
	0	n ɑ	2.06861e-05	-0.435126
	0	n ɑː	0.000818007	-0.0580424
	0	n a͡u	8.34637e-06	-0.440962
	0	n a͡uː	1.50425e-05	-0.437795
	0	n ɔ	0.00143667	0.234548
	0	n e	0.00019929	-0.350657
	0	n e̞	0.000563252	-0.178525
	0	n eː	0.00347939	1.20063
	0	n ɛ	1.08473e-05	-0.439779
	0	n ɛ̝	0.00140644	0.22025
	0	n ɛː	0.00147761	0.253908
	0	n i	6.84916e-05	-0.412517
	0	n ɪ	0.00121309	0.12881
	0	n iː	0.000579031	-0.171063
	0	n ʝ	0.000384111	-0.263248
	0	n o	1.83467e-05	-0.436232
	0	n ɵ	0.000340207	-0.284012
	0	n oː	0.000523866	-0.197153
	0	n u	9.2711e-05	-0.401062
	0	n ʉ	5.73959e-05	-0.417764
	0	n ʉ̞	2.97363e-05	-0.430846
	0	n ʊ	0.00110692	0.0785957
	0	n uː	0.00118043	0.113364
	0	n ʉː	0.000217292	-0.342143
	0	n y	3.32877e-05	-0.429166
	0	n ʏ	0.000972192	0.0148779
	0	n yː	0.00314679	1.04333
	0	n ø̞	0.000330452	-0.288626
	0	n øː	0.000637699	-0.143317
	0	o b	7.65949e-06	-0.441287
	0	o d	2.04827e-05	-0.435222
	0	ɵ d	4.27124e-06	-0.442889
	0	ɵ dː	0.000159045	-0.36969
	0	ɵ fː	1.40722e-05	-0.438254
	0	ɵ ɡː	6.09966e-05	-0.416061
	0	o h	8.59668e-06	-0.440843
	0	o k	6.22983e-05	-0.415446
	0	ɵ kː	4.21561e-06	-0.442915
	0	o l	3.41833e-05	-0.428742
	0	o ɭ	2.13262e-06	-0.4439
	0	ɵ l	0.000100035	-0.397599
	0	ɵ lː	0.000483206	-0.216382
	0	o m	3.75576e-06	-0.443133
	0	ɵ m	4.26525e-06	-0.442892
	0	ɵ mː	0.000156281	-0.370998
	0	o n	5.66711e-06	-0.442229
	0	ɵ n	0.000614299	-0.154384
	0	ɵ nː	0.00374951	1.32838
	0	ɵ ŋː	0.00126894	0.155223
	0	ɵ p	5.01955e-05	-0.42117
	0	ɵ pː	0.00786528	3.27488
	0	o r	1.90943e-05	-0.435879
	0	ɵ r	7.49357e-05	-0.409469
	0	ɵ rː	2.25146e-05	-0.434261
	0	o s	2.49309e-05	-0.433118
	0	o ʂ	2.13262e-06	-0.4439
	0	ɵ s	1.89346e-05	-0.435954
	0	ɵ sː	1.37819e-06	-0.444257
	0	ɵ ʂː	9.06347e-06	-0.440623
	0	o t	2.33551e-05	-0.433863
	0	ɵ t	2.61614e-06	-0.443672
	0	ɵ tː	3.0771e-05	-0.430356
	0	o v	5.33156e-06	-0.442388
	0	oː a	6.69048e-06	-0.441745
	0	oː b	0.00014119	-0.378135
	0	oː d	0.000174292	-0.36248
	0	oː ɖ	0.000359263	-0.275
	0	oː ɡ	3.88118e-05	-0.426553
	0	oː h	5.15906e-05	-0.42051
	0	oː ʝ	6.34583e-06	-0.441908
	0	oː k	0.000562581	-0.178843
	0	oː l	0.000247078	-0.328056
	0	oː ɭ	2.57589e-05	-0.432727
	0	oː m	7.09587e-05	-0.41135
	0	oː n	1.41139e-05	-0.438234
	0	oː ɳ	1.59947e-06	-0.444153
	0	oː r	0.000230313	-0.335985
	0	oː s	0.000617023	-0.153095
	0	oː ʂ	0.000591391	-0.165218
	0	oː t	0.00284816	0.902095
	0	oː ʈ	8.15371e-05	-0.406347
	0	oː v	0.000100313	-0.397467
	0	p a	0.00853038	3.58943
	0	p ɑ	6.17659e-06	-0.441988
	0	p ɑː	0.000757525	-0.0866464
	0	p a͡u	5.6975e-05	-0.417963
	0	p a͡uː	0.000126436	-0.385113
	0	p ɔ	0.00303554	0.990714
	0	p e	7.62551e-05	-0.408845
	0	p e̞	0.00269335	0.828878
	0	p eː	0.00067831	-0.12411
	0	p e͡ʉː	2.4445e-06	-0.443753
	0	p ɛ	7.18164e-05	-0.410944
	0	p ɛ̝	0.00178586	0.399691
	0	p ɛː	0.000446895	-0.233555
	0	p f	4.19613e-06	-0.442924
	0	p ɪ	0.00237818	0.679821
	0	p iː	0.000792	-0.0703417
	0	p ʝ	0.0002015	-0.349612
	0	p l	0.00444356	1.65662
	0	p n	1.66679e-05	-0.437026
	0	p o	1.55124e-05	-0.437573
	0	p ɵ	0.00212027	0.557849
	0	p oː	0.00237032	0.676108
	0	p r	0.0122009	5.32537
	0	p s	0.000574916	-0.173009
	0	p ʉ	0.00035046	-0.279163
	0	p ʉ̞	6.90358e-05	-0.412259
	0	p ʊ	0.00312143	1.03134
	0	p uː	0.00032327	-0.292022
	0	p ʉː	0.000287618	-0.308884
	0	p y	8.5305e-06	-0.440875
	0	p ʏ	0.000418599	-0.246938
	0	p yː	0.000108008	-0.393828
	0	p ø̞	2.10697e-05	-0.434944
	0	p øː	0.00012472	-0.385924
	0	r a	0.00345243	1.18788
	0	r ɑ	5.66407e-05	-0.418121
	0	r ɑː	0.00213932	0.566857
	0	r a͡uː	5.01487e-05	-0.421192
	0	r ɔ	0.00184484	0.427586
	0	r e	0.000393702	-0.258712
	0	r e̞	0.00999539	4.28229
	0	r eː	0.00307568	1.0097
	0	r e͡ʉ	3.56966e-05	-0.428027
	0	r e͡ʉː	7.63582e-06	-0.441298
	0	r ɛ̝	0.00331721	1.12392
	0	r ɛː	0.000784504	-0.0738869
	0	r ɪ	0.00332247	1.12642
	0	r iː	0.00141056	0.222197
	0	r o	1.29683e-05	-0.438776
	0	r ɵ	0.00196574	0.484766
	0	r oː	0.00162321	0.32277
	0	r u	4.97088e-05	-0.4214
	0	r ʉ	0.000419275	-0.246618
	0	r ʉ̞	3.50948e-05	-0.428311
	0	r ʊ	0.000882292	-0.0276395
	0	r uː	0.00146391	0.247432
	0	r ʉː	0.000673228	-0.126514
	0	r y	1.24191e-05	-0.439036
	0	r ʏ	0.00157029	0.29774
	0	r yː	0.000305086	-0.300622
	0	r ø	4.22334e-05	-0.424935
	0	r ø̞	0.000939405	-0.000628223
	0	r øː	0.00213755	0.566021
	0	s a	0.00913209	3.87401
	0	s ɑ	5.07755e-06	-0.442508
	0	ʂ a	7.77497e-05	-0.408138
	0	ʂ ɑ	1.27842e-05	-0.438863
	0	s ɑː	0.00171544	0.366386
	0	ʂ ɑː	3.60152e-05	-0.427876
	0	s a͡uː	0.000141518	-0.37798
	0	ʂ a͡uː	3.70767e-06	-0.443156
	0	s ɔ	0.00356389	1.24059
	0	ʂ ɔ	9.63777e-06	-0.440351
	0	s e	8.71033e-05	-0.403715
	0	s e̞	0.00432584	1.60095
	0	ʂ e̞	7.37129e-06	-0.441423
	0	s eː	0.00289748	0.925422
	0	ʂ eː	4.86044e-06	-0.44261
	0	s ɛ	3.22114e-05	-0.429675
	0	s ɛ̝	0.00363532	1.27437
	0	ʂ ɛ̝	0.00013259	-0.382202
	0	s ɛː	0.00168781	0.353323
	0	s f	5.78671e-05	-0.417541
	0	s i	2.81018e-05	-0.431619
	0	s ɪ	0.00597135	2.37917
	0	ʂ ɪ	5.68499e-05	-0.418023
	0	s iː	0.00144855	0.240166
	0	ʂ iː	6.67803e-05	-0.413326
	0	s k	0.014447	6.38765
	0	s l	0.00686095	2.7999
	0	ʂ ɭ	8.29688e-05	-0.40567
	0	s m	0.00600269	2.39399
	0	ʂ m	1.36979e-05	-0.438431
	0	s n	0.00511343	1.97343
	0	ʂ ɳ	3.18108e-05	-0.429864
	0	s o	5.75812e-05	-0.417677
	0	s ɵ	0.00195755	0.48089
	0	ʂ ɵ	7.6507e-06	-0.441291
	0	s oː	0.00116432	0.10574
	0	s p	0.0114684	4.97892
	0	s r	1.31571e-05	-0.438687
	0	ʂ r	1.47445e-05	-0.437936
	0	s t	0.0245979	11.1884
	0	ʂ ʈ	1.53829e-05	-0.437634
	0	s u	2.4445e-06	-0.443753
	0	s ʉ	0.000251701	-0.32587
	0	s ʉ̞	0.000192873	-0.353692
	0	s ʊ	0.00192915	0.46746
	0	ʂ ʊ	3.18568e-05	-0.429843
	0	s uː	0.00218674	0.589286
	0	s ʉː	0.00105138	0.0523266
	0	ʂ uː	2.70213e-05	-0.43213
	0	s v	0.00613631	2.45719
	0	ʂ v	0.0001059	-0.394825
	0	s y	0.000105884	-0.394832
	0	s ʏ	0.00306036	1.00245
	0	ʂ ʏ	2.99984e-05	-0.430722
	0	s yː	0.00149139	0.260426
	0	s ø	6.21852e-05	-0.415499
	0	s ø̞	0.00168463	0.351815
	0	s øː	0.00104061	0.0472362
	0	ʂ øː	3.04244e-05	-0.43052
	0	t a	0.00488161	1.86379
	0	t ɑ	3.25738e-05	-0.429504
	0	t ɑː	0.00142161	0.227426
	0	t a͡uː	1.01253e-05	-0.44012
	0	t ɔ	0.00321342	1.07484
	0	t ɕ	5.85151e-05	-0.417235
	0	t e	0.000210629	-0.345294
	0	t e̞	0.00338017	1.1537
	0	t eː	0.00177862	0.39627
	0	t ɛ̝	0.00321452	1.07536
	0	t ɛː	0.000950234	0.00449296
	0	t i	3.37461e-05	-0.428949
	0	t ɪ	0.00588276	2.33727
	0	t iː	0.00279249	0.875768
	0	t o	4.74876e-06	-0.442663
	0	t ɵ	0.002164	0.578527
	0	t oː	0.0010037	0.0297787
	0	t r	0.013534	5.95585
	0	t s	5.15938e-05	-0.420508
	0	ʈ ʂ	9.24485e-06	-0.440537
	0	t u	0.000171966	-0.36358
	0	t ʉ	0.000706047	-0.110993
	0	t ʉ̞	4.54377e-05	-0.42342
	0	t ʊ	0.00119617	0.120805
	0	t uː	0.00159694	0.310345
	0	t ʉː	0.000659233	-0.133132
	0	t v	0.00273781	0.849905
	0	t y	9.06441e-06	-0.440622
	0	t ʏ	0.000810445	-0.0616183
	0	t yː	0.000699022	-0.114315
	0	t ø	1.39691e-05	-0.438302
	0	t ø̞	0.000357631	-0.275772
	0	t øː	0.000328535	-0.289532
	0	ʊ ɑː	2.29548e-05	-0.434053
	0	ʉ b	1.11963e-05	-0.439614
	0	ʊ b	2.21216e-05	-0.434447
	0	u d	1.37819e-06	-0.444257
	0	ʉ̞ d	9.50264e-06	-0.440415
	0	ʊ d	7.98611e-05	-0.40714
	0	u ɖ	2.31958e-05	-0.433939
	0	ʊ ɖ	4.08411e-05	-0.425594
	0	u e	6.21755e-06	-0.441968
	0	u e̞	1.62456e-05	-0.437226
	0	ʉ e̞	4.75095e-05	-0.42244
	0	ʉ eː	1.30129e-05	-0.438755
	0	u ɛ̝	2.11639e-05	-0.4349
	0	ʊ ɛ̝	6.23816e-06	-0.441959
	0	ʊ f	0.000127985	-0.38438
	0	ʉ ɡ	2.2409e-05	-0.434311
	0	ʊ h	3.96571e-05	-0.426154
	0	ʊ ʝː	2.30426e-06	-0.443819
	0	ʉ k	4.23588e-05	-0.424876
	0	ʉ̞ k	9.64415e-06	-0.440348
	0	ʊ k	5.15676e-05	-0.420521
	0	ʊ kː	0.000202172	-0.349294
	0	u l	5.44063e-06	-0.442336
	0	ʉ l	1.2611e-05	-0.438945
	0	ʉ̞ l	1.08908e-05	-0.439758
	0	ʊ l	0.00026155	-0.321212
	0	ʊ lː	9.62558e-05	-0.399386
	0	ʊ m	5.01586e-05	-0.421187
	0	ʉ n	0.000130831	-0.383034
	0	ʉ̞ n	3.41721e-06	-0.443293
	0	ʊ n	5.74292e-05	-0.417749
	0	ʊ ɳ	4.80528e-05	-0.422183
	0	ʊ nː	0.000247663	-0.32778
	0	ʊ p	8.9801e-05	-0.402439
	0	u r	3.73209e-06	-0.443144
	0	ʉ r	0.000249877	-0.326733
	0	ʉ̞ r	8.03998e-05	-0.406885
	0	ʊ r	0.000229463	-0.336387
	0	ʊ rː	0.000193421	-0.353433
	0	ʉ s	1.92707e-05	-0.435795
	0	ʉ̞ s	1.34195e-05	-0.438562
	0	ʉ̞ ʂ	1.06631e-06	-0.444405
	0	ʊ s	0.000119588	-0.388351
	0	ʊ ʂ	2.4445e-06	-0.443753
	0	ʊ sː	0.000354072	-0.277455
	0	ʊ ʂː	9.76728e-06	-0.44029
	0	u t	1.06631e-06	-0.444405
	0	ʉ t	6.59094e-05	-0.413738
	0	ʉ̞ t	1.10155e-05	-0.439699
	0	ʊ t	2.92484e-05	-0.431076
	0	ʊ tː	6.87293e-05	-0.412404
	0	ʊ ʈː	0.000117055	-0.389549
	0	u v	1.56576e-05	-0.437504
	0	ʉ̞ v	7.24291e-06	-0.441484
	0	ʊ v	7.09112e-05	-0.411372
	0	uː a	0.000261745	-0.32112
	0	uː ɑ	0.000136094	-0.380545
	0	uː ɑː	3.44192e-05	-0.428631
	0	uː a͡u	4.26525e-06	-0.442892
	0	uː b	0.00122494	0.134414
	0	ʉː b	8.6153e-05	-0.404164
	0	uː ɔ	8.12011e-05	-0.406506
	0	uː ɕ	0.00010664	-0.394475
	0	uː d	0.00059595	-0.163062
	0	ʉː d	1.41862e-05	-0.4382
	0	uː ɖ	0.000642967	-0.140825
	0	ʉː ɖ	4.10913e-05	-0.425475
	0	uː e	5.86553e-05	-0.417169
	0	uː e̞	0.000266432	-0.318903
	0	ʉː e	1.06631e-06	-0.444405
	0	ʉː e̞	9.1094e-06	-0.440601
	0	uː eː	2.34624e-05	-0.433813
	0	uː ɛ	1.92337e-05	-0.435813
	0	uː ɛ̝	2.61007e-05	-0.432565
	0	uː ɛː	4.46804e-05	-0.423778
	0	uː f	0.00109332	0.072162
	0	ʉː f	9.48127e-06	-0.440425
	0	uː ɡ	0.000112533	-0.391688
	0	ʉː ɡ	8.6211e-06	-0.440832
	0	uː h	0.00029659	-0.30464
	0	uː ɧ	0.00022812	-0.337022
	0	uː ɪ	0.000205593	-0.347676
	0	uː ʝ	0.000437763	-0.237874
	0	ʉː ʝ	9.57084e-06	-0.440383
	0	uː k	0.000508787	-0.204284
	0	uː l	0.000895056	-0.021603
	0	uː ɭ	1.52555e-05	-0.437694
	0	ʉː l	5.1987e-05	-0.420322
	0	ʉː ɭ	7.66226e-05	-0.408671
	0	uː m	0.000606195	-0.158216
	0	ʉː m	3.6608e-05	-0.427596
	0	uː n	0.000287699	-0.308845
	0	uː ɳ	2.12751e-05	-0.434847
	0	ʉː n	5.44061e-05	-0.419178
	0	ʉː ɳ	2.73694e-05	-0.431965
	0	uː o	3.16577e-05	-0.429937
	0	uː ɵ	0.000211821	-0.344731
	0	uː oː	2.42308e-05	-0.433449
	0	uː p	0.00059623	-0.162929
	0	uː r	0.000828671	-0.0529986
	0	ʉː r	0.000873123	-0.0319755
	0	uː s	0.00129372	0.166942
	0	uː ʂ	0.000118741	-0.388752
	0	ʉː s	7.06455e-05	-0.411498
	0	ʉː ʂ	0.000360961	-0.274197
	0	uː t	0.000856685	-0.0397497
	0	ʉː t	0.0118853	5.17609
	0	ʉː ʈ	0.000137844	-0.379717
	0	uː ʉ	0.000208625	-0.346242
	0	uː ʉ̞	5.11028e-06	-0.442492
	0	uː ʊ	8.84238e-06	-0.440727
	0	uː v	0.000645247	-0.139747
	0	ʉː v	2.25797e-05	-0.43423
	0	uː ø	8.68983e-05	-0.403811
	0	uː ø̞	4.43547e-05	-0.423932
	0	uː øː	3.19894e-06	-0.443396
	0	v a	0.00642193	2.59227
	0	v ɑ	4.78712e-05	-0.422269
	0	v ɑː	0.00480234	1.8263
	0	v ɔ	0.00104091	0.0473759
	0	v e	1.27515e-05	-0.438878
	0	v e̞	0.00102953	0.0419949
	0	v eː	0.00162444	0.323353
	0	v ɛ	3.26079e-05	-0.429487
	0	v ɛ̝	0.00754293	3.12243
	0	v ɛː	0.00565116	2.22774
	0	v i	5.56319e-05	-0.418599
	0	v ɪ	0.0072239	2.97155
	0	v iː	0.0040669	1.47848
	0	v l	1.29076e-05	-0.438805
	0	v o	1.31982e-05	-0.438667
	0	v ɵ	0.00046276	-0.226052
	0	v oː	0.00210252	0.549454
	0	v r	0.000697409	-0.115077
	0	v ʊ	0.000371576	-0.269176
	0	v uː	4.09766e-05	-0.42553
	0	v ʏ	3.96635e-05	-0.426151
	0	v yː	5.53289e-05	-0.418742
	0	v ø̞	4.38567e-05	-0.424168
	0	v øː	9.44012e-05	-0.400263
	0	ʏ ɡː	7.96435e-06	-0.441142
	0	ʏ ɧː	1.59947e-06	-0.444153
	0	ʏ kː	5.94702e-05	-0.416783
	0	ʏ lː	0.000138891	-0.379222
	0	ʏ mː	5.48672e-05	-0.41896
	0	ʏ nː	1.19887e-05	-0.439239
	0	ʏ ŋː	0.000197519	-0.351495
	0	ʏ pː	6.7321e-05	-0.41307
	0	ʏ rː	0.000694927	-0.116252
	0	y s	1.06631e-06	-0.444405
	0	ʏ s	6.04591e-06	-0.44205
	0	ʏ sː	5.55971e-05	-0.418615
	0	ʏ ʂː	2.65433e-05	-0.432356
	0	ʏ t	9.32589e-06	-0.440498
	0	ʏ tː	0.000516518	-0.200628
	0	ʏ v	1.46614e-05	-0.437975
	0	yː d	8.46138e-06	-0.440907
	0	yː ɖ	6.42445e-06	-0.441871
	0	yː ɡ	1.59947e-06	-0.444153
	0	yː ɧ	1.06631e-06	-0.444405
	0	yː l	4.56582e-05	-0.423316
	0	yː m	1.01473e-05	-0.44011
	0	yː r	8.68551e-05	-0.403832
	0	yː s	1.77878e-05	-0.436496
	0	yː ʂ	7.48017e-06	-0.441371
	0	yː t	0.000199942	-0.350349
	0	yː ʈ	4.02778e-06	-0.443004
	0	yː v	5.5807e-05	-0.418516
	0	ø d	4.04397e-06	-0.442996
	0	ø̞ d	9.92797e-06	-0.440214
	0	ø̞ dː	2.97766e-06	-0.443501
	0	ø ɡ	4.05194e-06	-0.442993
	0	ø̞ ɧː	5.70034e-05	-0.41795
	0	ø̞ ʝː	4.19694e-05	-0.42506
	0	ø̞ kː	1.07119e-05	-0.439843
	0	ø l	1.03727e-05	-0.440003
	0	ø̞ lː	1.27806e-05	-0.438865
	0	ø̞ mː	0.000235834	-0.333374
	0	ø ɳ	9.44087e-06	-0.440444
	0	ø̞ n	4.47898e-06	-0.442791
	0	ø̞ ɳ	1.69007e-06	-0.44411
	0	ø̞ nː	0.000237948	-0.332374
	0	ø̞ ŋː	1.82976e-05	-0.436255
	0	ø̞ pː	0.000285888	-0.309702
	0	ø r	7.9151e-05	-0.407475
	0	ø̞ r	5.45994e-06	-0.442327
	0	ø̞ rː	1.93889e-05	-0.435739
	0	ø̞ s	0.000102215	-0.396567
	0	ø̞ sː	0.000641004	-0.141754
	0	ø̞ ʈː	0.000117211	-0.389476
	0	ø v	0.000157012	-0.370652
	0	øː a	1.52919e-05	-0.437677
	0	øː b	3.76074e-05	-0.427123
	0	øː ɕ	2.89354e-05	-0.431224
	0	øː d	0.000460827	-0.226966
	0	øː ɡ	0.00061536	-0.153882
	0	øː h	8.71862e-06	-0.440786
	0	øː ʝ	1.06631e-06	-0.444405
	0	øː k	0.000269754	-0.317332
	0	øː l	0.000341549	-0.283377
	0	øː ɭ	8.90968e-05	-0.402772
	0	øː m	1.79828e-05	-0.436404
	0	øː n	1.58029e-05	-0.437435
	0	øː ɳ	0.00011281	-0.391557
	0	øː r	0.0004421	-0.235823
	0	øː s	0.000105086	-0.39521
	0	øː ʂ	3.38914e-05	-0.42888
	0	øː ʈ	5.95531e-06	-0.442093
	0	øː v	0.00582795	2.31135
	1	a b	0.00175408	1.02938
	1	ɑ b	8.10078e-06	-0.444964
	1	a bː	0.000410233	-0.105395
	1	a d	0.000734553	0.168469
	1	ɑ d	3.78869e-05	-0.419812
	1	a dː	0.000630417	0.0805334
	1	a ɖ	0.000477983	-0.048185
	1	ɑ ɖ	2.3083e-06	-0.449855
	1	a ɛ̝	1.40505e-05	-0.439939
	1	a f	0.000291151	-0.20595
	1	a fː	0.00168762	0.973256
	1	a ɡ	0.000558906	0.020148
	1	ɑ ɡ	8.35615e-05	-0.381243
	1	a ɡː	0.000940307	0.342211
	1	a h	0.000178122	-0.301394
	1	ɑ h	8.14757e-06	-0.444924
	1	a ɧ	0.000433981	-0.0853409
	1	a ɧː	4.60622e-05	-0.412908
	1	a i	9.34714e-06	-0.443911
	1	a ɪ	2.82244e-05	-0.427971
	1	ɑ ɪ	2.44879e-06	-0.449736
	1	a iː	6.35443e-05	-0.398146
	1	a ʝ	0.000588269	0.0449432
	1	a ʝː	0.0020941	1.3165
	1	a k	0.00184724	1.10805
	1	ɑ k	3.4615e-05	-0.422574
	1	a kː	0.00620821	4.79054
	1	a l	0.004563	3.40129
	1	a ɭ	0.000301123	-0.197529
	1	ɑ l	3.87082e-05	-0.419118
	1	ɑ ɭ	0.000232384	-0.255574
	1	a lː	0.00872715	6.91759
	1	a m	0.00244919	1.61634
	1	a ɱ	5.3589e-05	-0.406552
	1	ɑ m	2.72821e-05	-0.428766
	1	a mː	0.00812312	6.40754
	1	a ɱː	6.13871e-05	-0.399967
	1	a n	0.00448081	3.33188
	1	a ɳ	0.000178653	-0.300945
	1	ɑ n	0.000135264	-0.337584
	1	ɑ ɳ	1.60227e-06	-0.450451
	1	a nː	0.0107131	8.59459
	1	a ɳː	3.21313e-05	-0.424672
	1	a ŋ	0.0013048	0.649998
	1	ɑ ŋ	4.98833e-06	-0.447592
	1	a ŋː	0.00286692	1.96909
	1	a oː	2.1319e-05	-0.433802
	1	a p	0.00169424	0.978847
	1	ɑ p	7.78969e-06	-0.445226
	1	a pː	0.00182965	1.09319
	1	a r	0.00582017	4.46287
	1	ɑ r	3.48372e-05	-0.422387
	1	a rː	0.00438218	3.24861
	1	a s	0.00300828	2.08845
	1	a ʂ	0.000461293	-0.0622781
	1	ɑ s	4.3904e-05	-0.414731
	1	ɑ ʂ	0.000118716	-0.351558
	1	a sː	0.00508129	3.83895
	1	a ʂː	0.000440013	-0.0802476
	1	a t	0.0046224	3.45145
	1	a ʈ	0.00137276	0.70738
	1	ɑ t	8.36481e-06	-0.444741
	1	ɑ ʈ	3.25978e-05	-0.424278
	1	a tː	0.00424673	3.13422
	1	a ʈː	0.000502181	-0.0277515
	1	ɑ ʊ	5.9936e-05	-0.401193
	1	a uː	3.09735e-05	-0.425649
	1	a v	0.00127858	0.627858
	1	ɑ v	0.000142162	-0.331759
	1	a vː	6.9253e-05	-0.393325
	1	ɑː a	1.31919e-05	-0.440665
	1	ɑː b	0.000508726	-0.0222251
	1	ɑː d	0.00255485	1.70557
	1	ɑː ɖ	0.000849184	0.265265
	1	ɑː e̞	7.18417e-06	-0.445738
	1	ɑː f	3.65196e-05	-0.420966
	1	ɑː ɡ	0.00435718	3.22749
	1	ɑː h	2.3091e-05	-0.432305
	1	ɑː ɪ	7.02949e-06	-0.445868
	1	ɑː ʝ	2.05107e-05	-0.434484
	1	ɑː k	0.00378959	2.74821
	1	ɑː l	0.00383127	2.7834
	1	ɑː ɭ	0.000547348	0.0103882
	1	ɑː m	0.0013792	0.712824
	1	ɑː ɱ	0.000174958	-0.304066
	1	ɑː n	0.00163796	0.931321
	1	ɑː ɳ	0.00223091	1.43203
	1	ɑː ŋ	5.0401e-05	-0.409244
	1	ɑː ɵ	1.3806e-06	-0.450638
	1	ɑː p	0.00093328	0.336278
	1	ɑː r	0.0023275	1.51359
	1	ɑː s	0.00215278	1.36605
	1	ɑː ʂ	0.000428629	-0.0898606
	1	ɑː t	0.00355395	2.54923
	1	ɑː ʈ	0.000974776	0.371318
	1	ɑː ʊ	2.08951e-05	-0.43416
	1	ɑː v	0.000841561	0.258828
	1	a͡u d	9.34223e-06	-0.443915
	1	a͡u k	4.68297e-05	-0.41226
	1	a͡u l	3.37966e-05	-0.423265
	1	a͡u n	1.06818e-05	-0.442784
	1	a͡u p	1.175e-05	-0.441882
	1	a͡u r	5.36914e-05	-0.406466
	1	a͡u s	4.65381e-05	-0.412506
	1	a͡u t	8.08316e-06	-0.444978
	1	a͡uː b	7.25091e-05	-0.390576
	1	a͡uː d	8.19967e-05	-0.382564
	1	a͡uː e̞	2.66674e-05	-0.429285
	1	a͡uː f	4.73758e-06	-0.447803
	1	a͡uː ɡ	1.38448e-05	-0.440113
	1	a͡uː h	9.57437e-06	-0.443719
	1	a͡uː ɪ	6.78249e-06	-0.446077
	1	a͡uː k	2.87598e-05	-0.427519
	1	a͡uː l	6.84299e-05	-0.39402
	1	a͡uː m	3.23736e-05	-0.424467
	1	a͡uː n	0.000115647	-0.354149
	1	a͡uː ɳ	3.69321e-05	-0.420618
	1	a͡uː p	1.05001e-05	-0.442938
	1	a͡uː r	7.14842e-05	-0.391441
	1	a͡uː s	0.000103028	-0.364805
	1	a͡uː t	5.78146e-05	-0.402984
	1	b a	5.85717e-05	-0.402345
	1	b ɑː	7.69592e-06	-0.445305
	1	b ɔ	0.000170906	-0.307487
	1	b d	0.000168678	-0.309369
	1	b e	4.76264e-05	-0.411587
	1	b e̞	0.00105479	0.438882
	1	b eː	5.35712e-05	-0.406567
	1	b ɛ̝	4.51206e-05	-0.413703
	1	b ɛː	2.87219e-05	-0.427551
	1	b ɪ	9.15693e-05	-0.374481
	1	b ʝ	9.56827e-05	-0.371007
	1	b k	4.16983e-06	-0.448283
	1	b l	0.000218342	-0.267431
	1	b m	1.06818e-06	-0.450902
	1	b n	2.80241e-05	-0.42814
	1	b o	6.27667e-05	-0.398802
	1	b ɵ	2.79186e-05	-0.428229
	1	b oː	3.36463e-05	-0.423392
	1	b r	0.000174898	-0.304116
	1	b s	2.16607e-05	-0.433513
	1	b u	1.84245e-05	-0.436246
	1	b ʉ̞	7.7527e-06	-0.445257
	1	b ʊ	0.000122556	-0.348315
	1	b uː	5.07223e-05	-0.408973
	1	b ʉː	1.3806e-06	-0.450638
	1	b y	1.61269e-05	-0.438186
	1	b ʏ	2.98263e-05	-0.426618
	1	b ø	1.22669e-05	-0.441446
	1	b ø̞	1.66201e-05	-0.43777
	1	bː a	3.1363e-05	-0.42532
	1	bː ɔ	8.39526e-05	-0.380913
	1	bː d	1.11661e-05	-0.442375
	1	bː e̞	2.80621e-05	-0.428108
	1	bː ɪ	7.28862e-06	-0.445649
	1	bː ʝ	1.14133e-05	-0.442166
	1	bː l	8.85787e-06	-0.444324
	1	bː r	1.60227e-06	-0.450451
	1	bː s	1.89839e-05	-0.435774
	1	bː t	2.13636e-06	-0.45
	1	ɔ a	2.91288e-05	-0.427207
	1	ɕ a	1.67206e-05	-0.437685
	1	ɕ a͡uː	8.26253e-06	-0.444827
	1	ɔ b	7.25464e-05	-0.390544
	1	ɔ bː	0.000749262	0.180889
	1	ɔ d	7.37293e-05	-0.389545
	1	ɔ dː	0.000297408	-0.200667
	1	ɔ ɖ	4.92132e-05	-0.410247
	1	ɕ e̞	2.17797e-05	-0.433413
	1	ɕ eː	4.27272e-06	-0.448196
	1	ɔ ɛ̝	5.44755e-06	-0.447204
	1	ɕ ɛ	2.13636e-06	-0.45
	1	ɕ ɛ̝	7.07101e-05	-0.392095
	1	ɕ ɛː	1.67091e-05	-0.437695
	1	ɔ f	7.92822e-05	-0.384856
	1	ɔ fː	0.000710325	0.148009
	1	ɔ ɡ	0.000166644	-0.311086
	1	ɔ ɡː	0.000299792	-0.198653
	1	ɔ h	7.04982e-06	-0.445851
	1	ɔ ɧː	2.22303e-05	-0.433032
	1	ɕ ɪ	5.05219e-06	-0.447538
	1	ɔ ʝ	6.91163e-05	-0.393441
	1	ɔ ʝː	0.000991799	0.385693
	1	ɔ k	0.000638177	0.0870862
	1	ɔ kː	0.00285863	1.96208
	1	ɔ l	0.00154085	0.849319
	1	ɔ ɭ	3.93548e-05	-0.418572
	1	ɔ lː	0.00590951	4.53832
	1	ɔ ɭː	5.12124e-06	-0.44748
	1	ɔ m	0.00315104	2.209
	1	ɔ ɱ	0.00122212	0.580181
	1	ɔ mː	0.00249225	1.65271
	1	ɔ n	0.00541863	4.12381
	1	ɔ ɳ	6.79062e-05	-0.394463
	1	ɔ nː	0.00290535	2.00153
	1	ɔ ɳː	9.07548e-06	-0.44414
	1	ɔ ŋ	0.00100483	0.396696
	1	ɔ ŋː	0.00321395	2.26212
	1	ɔ p	0.000297162	-0.200874
	1	ɔ pː	0.00256909	1.71759
	1	ɔ r	0.00139232	0.723905
	1	ɔ rː	0.00422084	3.11236
	1	ɔ s	0.000577478	0.0358312
	1	ɔ ʂ	0.000177998	-0.301499
	1	ɔ sː	0.00246107	1.62638
	1	ɔ ʂː	0.0017578	1.03252
	1	ɔ t	0.000198258	-0.284391
	1	ɔ ʈ	0.000327535	-0.175227
	1	ɔ tː	0.0018306	1.09399
	1	ɔ ʈː	0.00227607	1.47015
	1	ɕ ʉ	1.20962e-05	-0.44159
	1	ɔ v	0.000224017	-0.262639
	1	ɔ vː	0.000175237	-0.30383
	1	ɕ ʏ	3.86273e-05	-0.419186
	1	ɕ øː	1.3806e-06	-0.450638
	1	d a	0.000172731	-0.305946
	1	d ɑ	2.45971e-05	-0.431034
	1	d ɑː	4.70567e-05	-0.412068
	1	d b	2.11358e-05	-0.433956
	1	d ɔ	0.000248633	-0.241853
	1	d e	2.59748e-05	-0.42987
	1	d e̞	0.00148657	0.803489
	1	d eː	0.000371742	-0.137897
	1	d ɛ̝	5.85352e-05	-0.402376
	1	d f	1.25844e-05	-0.441177
	1	d ɡ	7.55996e-06	-0.44542
	1	d h	6.42877e-06	-0.446375
	1	d ɪ	0.000479445	-0.0469502
	1	d iː	3.81413e-05	-0.419597
	1	d ʝ	4.76426e-05	-0.411574
	1	d k	8.85031e-06	-0.444331
	1	d l	0.000322127	-0.179793
	1	d m	0.00023428	-0.253973
	1	d n	1.29872e-05	-0.440837
	1	d ɵ	3.30335e-05	-0.42391
	1	d oː	8.86777e-05	-0.376923
	1	d r	0.000910164	0.316758
	1	d s	0.000159323	-0.317268
	1	d u	3.91057e-06	-0.448502
	1	d ʉ	6.50185e-06	-0.446314
	1	d ʉ̞	1.86932e-05	-0.436019
	1	d ʊ	2.38836e-05	-0.431636
	1	d uː	3.40638e-05	-0.42304
	1	d ʉː	2.91552e-05	-0.427185
	1	d v	0.000326179	-0.176371
	1	d ʏ	8.39453e-05	-0.380919
	1	d ø	2.045e-05	-0.434536
	1	d ø̞	1.76443e-05	-0.436905
	1	d øː	3.50588e-05	-0.4222
	1	dː a	9.45654e-05	-0.371951
	1	dː b	5.77211e-06	-0.44693
	1	dː e̞	6.40573e-05	-0.397713
	1	dː ɡ	9.05133e-06	-0.444161
	1	dː ɪ	5.15365e-05	-0.408285
	1	dː ʝ	1.77438e-05	-0.436821
	1	dː k	2.44776e-05	-0.431135
	1	dː l	1.46405e-05	-0.439441
	1	dː m	7.54718e-06	-0.445431
	1	dː n	3.60772e-06	-0.448758
	1	dː r	1.35364e-05	-0.440374
	1	dː s	2.7355e-05	-0.428705
	1	dː ʊ	3.68891e-06	-0.448689
	1	dː v	1.3491e-05	-0.440412
	1	ɖ a	6.17058e-05	-0.399698
	1	ɖ ɑ	1.06818e-06	-0.450902
	1	ɖ b	9.06645e-05	-0.375245
	1	ɖ ɔ	3.73863e-06	-0.448647
	1	ɖ e̞	0.000167599	-0.31028
	1	ɖ ɛ̝	9.1081e-05	-0.374893
	1	ɖ f	0.000157165	-0.319091
	1	ɖ ɡ	1.2806e-05	-0.44099
	1	ɖ h	7.56802e-06	-0.445413
	1	ɖ ɧ	4.27272e-06	-0.448196
	1	ɖ ɪ	9.07119e-05	-0.375205
	1	ɖ iː	6.66317e-06	-0.446177
	1	ɖ k	6.57384e-05	-0.396293
	1	ɖ ɭ	4.83627e-05	-0.410966
	1	ɖ m	1.09821e-05	-0.44253
	1	ɖ ɳ	0.000236603	-0.252011
	1	ɖ ɵ	1.2554e-05	-0.441203
	1	ɖ oː	1.71021e-05	-0.437363
	1	ɖ r	4.34311e-05	-0.41513
	1	ɖ ʂ	7.18579e-05	-0.391126
	1	ɖ v	5.33901e-05	-0.40672
	1	e a	0.000153149	-0.322482
	1	e̞ a	0.000386342	-0.125569
	1	e̞ ɑ	2.3083e-06	-0.449855
	1	e̞ ɑː	0.000674383	0.11766
	1	e b	1.43437e-05	-0.439692
	1	e̞ b	0.000929097	0.332746
	1	e ɔ	5.1438e-05	-0.408369
	1	e̞ ɔ	3.5045e-05	-0.422211
	1	e̞ ɕ	0.000333639	-0.170072
	1	e d	7.59843e-05	-0.387641
	1	e̞ d	0.00194313	1.18901
	1	e̞ ɖ	1.44002e-05	-0.439644
	1	e e̞	5.68298e-05	-0.403816
	1	e̞ e̞	1.06818e-06	-0.450902
	1	e̞ eː	5.11924e-06	-0.447481
	1	e ɛ̝	1.5368e-05	-0.438827
	1	e̞ ɛ̝	2.20849e-05	-0.433155
	1	e f	2.0196e-05	-0.43475
	1	e̞ f	0.00198732	1.22633
	1	e ɡ	6.47943e-05	-0.39709
	1	e̞ ɡ	0.00203876	1.26977
	1	e h	5.31489e-06	-0.447316
	1	e̞ h	0.000851333	0.26708
	1	e ɧ	5.93016e-06	-0.446796
	1	e̞ ɧ	0.000626124	0.0769084
	1	e i	1.17547e-05	-0.441878
	1	e ɪ	3.17566e-05	-0.424988
	1	e̞ ɪ	3.21154e-05	-0.424685
	1	e̞ iː	2.38748e-05	-0.431644
	1	e ʝ	3.27276e-05	-0.424168
	1	e̞ ʝ	0.00159856	0.898057
	1	e k	5.57663e-05	-0.404714
	1	e̞ k	0.00416031	3.06125
	1	e l	4.52559e-05	-0.413589
	1	e̞ l	0.00367972	2.65543
	1	e̞ ɭ	7.74606e-05	-0.386395
	1	e m	1.11899e-05	-0.442355
	1	e̞ m	0.00298838	2.07164
	1	e̞ ɱ	6.60474e-06	-0.446227
	1	e n	9.66593e-05	-0.370183
	1	e̞ n	0.00413902	3.04328
	1	e̞ ɳ	0.000117953	-0.352202
	1	e̞ ŋ	0.000117947	-0.352207
	1	e̞ ɵ	9.29336e-05	-0.373329
	1	e̞ oː	8.30654e-05	-0.381662
	1	e p	2.04467e-05	-0.434538
	1	e̞ p	0.00180283	1.07055
	1	e r	8.11545e-05	-0.383275
	1	e̞ r	0.0044283	3.28755
	1	e s	4.78257e-05	-0.411419
	1	e̞ s	0.00681094	5.2995
	1	e̞ ʂ	0.00125647	0.609187
	1	e t	0.00010451	-0.363553
	1	e ʈ	1.35855e-05	-0.440332
	1	e̞ t	0.00372505	2.69371
	1	e̞ ʈ	0.000136738	-0.336339
	1	e̞ tː	1.08029e-05	-0.442682
	1	e ʉ	0.000144541	-0.32975
	1	e ʊ	0.000418186	-0.0986788
	1	e̞ ʊ	0.000145917	-0.328589
	1	e v	6.04299e-05	-0.400776
	1	e̞ v	0.00204085	1.27153
	1	eː a	0.000223847	-0.262782
	1	eː b	0.000391724	-0.121024
	1	eː ɔ	4.92717e-05	-0.410198
	1	eː ɕ	7.78969e-06	-0.445226
	1	eː d	0.00774411	6.08749
	1	eː ɖ	0.000136821	-0.336269
	1	eː e̞	0.000358818	-0.148811
	1	eː ɛ̝	8.4854e-05	-0.380151
	1	eː f	0.00045411	-0.0683438
	1	eː ɡ	0.00190081	1.15328
	1	eː h	8.13552e-05	-0.383106
	1	eː ɧ	4.06958e-05	-0.41744
	1	eː ʝ	2.13636e-06	-0.45
	1	eː k	0.00123119	0.587837
	1	eː l	0.00340628	2.42453
	1	eː ɭ	4.58392e-05	-0.413096
	1	eː m	0.000749355	0.180967
	1	eː ɱ	0.000287428	-0.209094
	1	eː n	0.00447224	3.32465
	1	eː ɳ	8.22089e-06	-0.444862
	1	eː ŋ	0.000149459	-0.325598
	1	eː p	0.000311176	-0.189041
	1	eː r	0.00162761	0.922582
	1	eː s	0.00133281	0.673647
	1	eː ʂ	0.000305726	-0.193643
	1	eː t	0.00190775	1.15914
	1	eː ʈ	9.63456e-05	-0.370448
	1	eː ʉ	8.84574e-06	-0.444334
	1	eː ʉ̞	7.03393e-06	-0.445864
	1	eː ʊ	0.000133953	-0.338691
	1	eː uː	9.09073e-06	-0.444128
	1	eː v	0.00147551	0.794146
	1	e͡ʉ k	2.05044e-05	-0.43449
	1	e͡ʉ m	3.57591e-05	-0.421608
	1	e͡ʉ r	6.81227e-06	-0.446052
	1	e͡ʉː m	7.64921e-06	-0.445345
	1	e͡ʉː r	2.98288e-06	-0.449285
	1	ɛ b	1.06818e-06	-0.450902
	1	ɛ̝ b	1.70729e-05	-0.437387
	1	ɛ̝ bː	0.000227744	-0.259492
	1	ɛ̝ dː	0.000766895	0.195779
	1	ɛ ɖ	4.27272e-06	-0.448196
	1	ɛ̝ ɖ	0.000152285	-0.323211
	1	ɛ̝ fː	0.000292606	-0.204721
	1	ɛ ɡ	7.6928e-06	-0.445308
	1	ɛ̝ ɡ	2.67045e-06	-0.449549
	1	ɛ̝ ɡː	0.000762385	0.19197
	1	ɛ̝ h	1.31987e-05	-0.440659
	1	ɛ̝ ɧː	0.000107134	-0.361337
	1	ɛ̝ ʝ	7.06539e-06	-0.445838
	1	ɛ̝ ʝː	0.00241369	1.58637
	1	ɛ k	2.38638e-05	-0.431653
	1	ɛ̝ k	2.5357e-05	-0.430392
	1	ɛ̝ kː	0.00515102	3.89783
	1	ɛ l	9.28907e-06	-0.44396
	1	ɛ ɭ	7.77908e-06	-0.445235
	1	ɛ̝ l	0.000158323	-0.318113
	1	ɛ̝ ɭ	3.1845e-05	-0.424913
	1	ɛ̝ lː	0.00878813	6.96908
	1	ɛ̝ m	3.55697e-05	-0.421768
	1	ɛ̝ mː	0.00564704	4.31668
	1	ɛ̝ ɱː	4.56217e-05	-0.41328
	1	ɛ n	2.67512e-05	-0.429215
	1	ɛ ɳ	3.5641e-05	-0.421708
	1	ɛ̝ n	6.56632e-05	-0.396357
	1	ɛ̝ ɳ	3.23401e-05	-0.424495
	1	ɛ̝ nː	0.0069861	5.44741
	1	ɛ̝ ɳː	1.24603e-05	-0.441282
	1	ɛ ŋ	4.80682e-06	-0.447745
	1	ɛ̝ ŋ	1.30893e-05	-0.440751
	1	ɛ̝ ŋː	0.00303851	2.11398
	1	ɛ̝ pː	0.00109178	0.470115
	1	ɛ r	0.000237889	-0.250925
	1	ɛ̝ r	0.00024051	-0.248712
	1	ɛ̝ rː	0.00712713	5.5665
	1	ɛ s	1.42398e-05	-0.43978
	1	ɛ̝ s	0.000350374	-0.15594
	1	ɛ̝ ʂ	4.75425e-05	-0.411658
	1	ɛ̝ sː	0.00502794	3.7939
	1	ɛ̝ ʂː	0.000763196	0.192656
	1	ɛ t	2.97133e-05	-0.426713
	1	ɛ̝ t	2.57184e-05	-0.430087
	1	ɛ̝ ʈ	3.20712e-05	-0.424722
	1	ɛ̝ tː	0.00491874	3.70169
	1	ɛ̝ ʈː	0.00102994	0.417896
	1	ɛ v	4.14362e-05	-0.416814
	1	ɛ̝ vː	0.000159044	-0.317504
	1	ɛː a	2.05957e-05	-0.434413
	1	ɛː b	0.000261865	-0.230679
	1	ɛː d	0.00108991	0.468542
	1	ɛː ɖ	0.00266498	1.79856
	1	ɛː e̞	1.09237e-05	-0.44258
	1	ɛː f	5.49328e-05	-0.405418
	1	ɛː ɡ	0.00158235	0.884367
	1	ɛː h	2.32552e-05	-0.432167
	1	ɛː k	0.00206053	1.28815
	1	ɛː l	0.00254192	1.69465
	1	ɛː ɭ	0.00100051	0.393051
	1	ɛː m	2.59417e-05	-0.429898
	1	ɛː ɱ	0.000105331	-0.36286
	1	ɛː n	0.000732488	0.166725
	1	ɛː ɳ	0.00313974	2.19946
	1	ɛː ŋ	2.30744e-05	-0.432319
	1	ɛː p	0.000122491	-0.34837
	1	ɛː r	0.00299477	2.07705
	1	ɛː s	0.0012188	0.577377
	1	ɛː ʂ	0.000466249	-0.0580932
	1	ɛː t	0.00106258	0.445465
	1	ɛː ʈ	0.000110645	-0.358373
	1	ɛː v	0.00164676	0.938758
	1	f a	8.00083e-05	-0.384243
	1	f ɑ	1.01887e-05	-0.4432
	1	f ɑː	3.69272e-05	-0.420622
	1	f b	8.51504e-06	-0.444614
	1	f ɔ	4.62463e-05	-0.412753
	1	f d	1.60227e-06	-0.450451
	1	f e	2.34688e-05	-0.431986
	1	f e̞	0.000275302	-0.219333
	1	f eː	3.06731e-05	-0.425903
	1	f ɛ	8.75498e-06	-0.444411
	1	f ɛ̝	0.000283519	-0.212395
	1	f ɛː	0.000613294	0.066075
	1	f ɡ	6.5291e-05	-0.396671
	1	f i	2.44879e-06	-0.449736
	1	f ɪ	0.000298972	-0.199346
	1	f iː	1.76098e-05	-0.436934
	1	f ʝ	6.82815e-06	-0.446038
	1	f l	4.89757e-06	-0.447668
	1	f ɵ	3.87294e-05	-0.4191
	1	f oː	2.36159e-05	-0.431862
	1	f p	7.31728e-06	-0.445625
	1	f r	0.000358221	-0.149315
	1	f s	1.95274e-05	-0.435315
	1	f t	3.98569e-05	-0.418148
	1	f ʉ̞	4.58515e-06	-0.447932
	1	f ʊ	4.59286e-05	-0.413021
	1	f uː	2.09166e-05	-0.434142
	1	f ʏ	3.39349e-05	-0.423149
	1	f yː	1.67475e-05	-0.437662
	1	f ø	5.59055e-05	-0.404596
	1	f ø̞	0.000629791	0.0800051
	1	f øː	1.57101e-05	-0.438538
	1	fː e̞	0.000291027	-0.206054
	1	fː ɛ̝	1.52897e-05	-0.438893
	1	fː ɪ	7.22071e-06	-0.445707
	1	fː p	9.95439e-06	-0.443398
	1	fː r	0.000106622	-0.36177
	1	fː s	1.97933e-05	-0.43509
	1	fː ʂ	2.06986e-05	-0.434326
	1	fː t	0.00206527	1.29216
	1	ɡ a	0.000396821	-0.11672
	1	ɡ ɑː	4.3426e-05	-0.415134
	1	ɡ b	2.13636e-06	-0.45
	1	ɡ ɔ	0.000638503	0.0873621
	1	ɡ d	1.8708e-05	-0.436007
	1	ɡ e	5.41085e-05	-0.406114
	1	ɡ e̞	0.000635896	0.0851604
	1	ɡ eː	7.27348e-05	-0.390385
	1	ɡ ɛ̝	9.06892e-05	-0.375224
	1	ɡ i	1.06818e-06	-0.450902
	1	ɡ ɪ	7.44044e-05	-0.388975
	1	ɡ iː	2.46463e-05	-0.430992
	1	ɡ l	9.27557e-05	-0.373479
	1	ɡ m	4.53542e-06	-0.447974
	1	ɡ n	0.000197063	-0.2854
	1	ɡ o	1.60227e-06	-0.450451
	1	ɡ ɵ	0.000110834	-0.358214
	1	ɡ oː	1.38701e-05	-0.440092
	1	ɡ r	0.000354206	-0.152705
	1	ɡ s	1.86491e-05	-0.436056
	1	ɡ ʉ	1.31228e-05	-0.440723
	1	ɡ ʉ̞	2.95008e-06	-0.449313
	1	ɡ ʊ	0.000180947	-0.299008
	1	ɡ ʉː	1.32214e-05	-0.44064
	1	ɡː a	2.46152e-05	-0.431018
	1	ɡː b	6.82201e-06	-0.446043
	1	ɡː d	1.5801e-05	-0.438461
	1	ɡː e̞	5.43854e-05	-0.40588
	1	ɡː f	1.40534e-05	-0.439937
	1	ɡː h	1.81127e-05	-0.436509
	1	ɡː ɧ	7.15271e-06	-0.445764
	1	ɡː ʝ	3.51697e-06	-0.448834
	1	ɡː k	4.46483e-05	-0.414102
	1	ɡː l	0.000102105	-0.365584
	1	ɡː m	1.25963e-05	-0.441167
	1	ɡː p	1.62396e-05	-0.438091
	1	ɡː r	4.02909e-05	-0.417782
	1	ɡː s	8.35663e-05	-0.381239
	1	ɡː t	6.31219e-06	-0.446474
	1	ɡː ʊ	7.18636e-06	-0.445736
	1	ɡː ʉː	2.39436e-05	-0.431585
	1	ɡː v	5.36696e-05	-0.406484
	1	h a	2.90659e-05	-0.42726
	1	h ɑː	2.58564e-05	-0.42997
	1	h ɔ	5.34796e-05	-0.406645
	1	h e	5.89871e-06	-0.446823
	1	h e̞	1.91869e-05	-0.435602
	1	h eː	3.41026e-05	-0.423007
	1	h ɛ	5.96575e-06	-0.446766
	1	h ɛ̝	0.000106967	-0.361479
	1	h ɛː	2.39046e-05	-0.431618
	1	h ɪ	1.16505e-05	-0.441966
	1	h o	1.03121e-05	-0.443096
	1	h ɵ	4.27272e-06	-0.448196
	1	h oː	4.79094e-05	-0.411348
	1	h ʉ	6.89144e-06	-0.445985
	1	h uː	8.09644e-05	-0.383436
	1	h ʉː	7.42754e-06	-0.445532
	1	h ʏ	5.15287e-05	-0.408292
	1	h yː	1.77511e-05	-0.436815
	1	h ø	4.54793e-05	-0.4134
	1	h ø̞	8.75498e-06	-0.444411
	1	h øː	4.28497e-05	-0.415621
	1	ɧ a	7.47727e-06	-0.44549
	1	ɧ e̞	2.1012e-05	-0.434061
	1	ɧ eː	1.57514e-05	-0.438503
	1	ɧ ɛ̝	8.48959e-05	-0.380116
	1	ɧ ɛː	1.26659e-05	-0.441109
	1	ɧ ɪ	4.49011e-05	-0.413889
	1	ɧ t	1.06818e-06	-0.450902
	1	ɧ ʉ̞	9.28907e-06	-0.44396
	1	ɧ ʊ	1.65308e-05	-0.437845
	1	ɧ uː	2.51023e-05	-0.430607
	1	ɧ ʏ	7.32889e-05	-0.389917
	1	ɧ øː	2.27937e-05	-0.432557
	1	ɧː ɪ	6.27907e-06	-0.446502
	1	ɧː ɵ	1.06818e-06	-0.450902
	1	ɧː t	9.06511e-06	-0.444149
	1	ɧː ø̞	1.3602e-05	-0.440318
	1	ɧː øː	4.07842e-05	-0.417365
	1	i a	0.000721532	0.157473
	1	ɪ a	0.000195396	-0.286808
	1	ɪ ɑː	0.000257067	-0.234731
	1	i b	1.06818e-06	-0.450902
	1	ɪ b	0.000704877	0.143409
	1	ɪ bː	0.000182266	-0.297894
	1	i ɔ	1.20624e-05	-0.441618
	1	ɪ ɔ	8.83706e-05	-0.377182
	1	ɪ ɕ	1.99915e-05	-0.434923
	1	i d	3.93853e-05	-0.418546
	1	ɪ d	0.000183449	-0.296896
	1	ɪ dː	0.000521176	-0.0117116
	1	i e̞	4.86982e-05	-0.410682
	1	ɪ e̞	0.000237758	-0.251036
	1	i eː	3.82089e-05	-0.41954
	1	ɪ eː	6.59279e-05	-0.396133
	1	i ɛ̝	7.52787e-06	-0.445447
	1	ɪ ɛ̝	7.5674e-05	-0.387903
	1	i f	9.70439e-06	-0.443609
	1	ɪ f	0.000291271	-0.205849
	1	ɪ fː	0.00240916	1.58255
	1	i ɡ	1.34168e-05	-0.440475
	1	ɪ ɡ	0.000957761	0.35695
	1	ɪ ɡː	0.000655909	0.10206
	1	ɪ h	3.98057e-05	-0.418191
	1	ɪ ɧ	0.000266019	-0.227172
	1	ɪ ɧː	5.96575e-06	-0.446766
	1	ɪ iː	8.95462e-06	-0.444243
	1	ɪ ʝ	0.000121346	-0.349337
	1	ɪ ʝː	2.51046e-06	-0.449684
	1	i k	7.97419e-05	-0.384468
	1	ɪ k	0.00116691	0.533556
	1	ɪ kː	0.00380056	2.75747
	1	i l	0.000143048	-0.331011
	1	ɪ l	0.00423146	3.12133
	1	ɪ ɭ	2.90775e-05	-0.42725
	1	ɪ lː	0.0100895	8.06797
	1	i m	8.54545e-06	-0.444588
	1	ɪ m	0.000481892	-0.0448839
	1	ɪ ɱ	2.1431e-05	-0.433707
	1	ɪ mː	0.00231888	1.50631
	1	ɪ ɱː	7.74453e-05	-0.386408
	1	i n	1.91469e-06	-0.450187
	1	ɪ n	0.00259208	1.73701
	1	ɪ nː	0.00558917	4.26781
	1	ɪ ɳː	1.69103e-05	-0.437525
	1	ɪ ŋ	0.000506243	-0.0243214
	1	ɪ ŋː	0.00281649	1.92651
	1	ɪ oː	2.8941e-05	-0.427366
	1	i p	2.42141e-05	-0.431357
	1	ɪ p	0.000233838	-0.254346
	1	ɪ pː	0.000908233	0.315128
	1	i r	3.79088e-05	-0.419793
	1	ɪ r	0.00112659	0.499509
	1	ɪ rː	0.000945326	0.34645
	1	i s	3.00881e-05	-0.426397
	1	ɪ s	0.00299958	2.0811
	1	ɪ ʂ	1.76038e-05	-0.436939
	1	ɪ sː	0.00543263	4.13562
	1	ɪ ʂː	0.000146054	-0.328473
	1	i t	2.6095e-05	-0.429769
	1	ɪ t	0.00147506	0.793766
	1	ɪ ʈ	5.20746e-05	-0.407831
	1	ɪ tː	0.0020659	1.29268
	1	ɪ ʈː	3.4038e-05	-0.423062
	1	i ʉ	1.91469e-06	-0.450187
	1	ɪ ʉ	1.60227e-06	-0.450451
	1	ɪ ʉ̞	5.34091e-06	-0.447294
	1	i ʊ	0.000338696	-0.165802
	1	ɪ ʊ	0.000195713	-0.28654
	1	ɪ uː	0.000154585	-0.321269
	1	i v	3.35047e-05	-0.423512
	1	ɪ v	0.000774995	0.202619
	1	ɪ vː	5.44291e-05	-0.405843
	1	iː a	0.000298654	-0.199614
	1	iː ɑ	5.11924e-06	-0.447481
	1	iː ɑː	2.13636e-06	-0.45
	1	iː b	0.000607408	0.0611047
	1	iː ɔ	8.46192e-05	-0.38035
	1	iː ɕ	1.02168e-05	-0.443177
	1	iː d	0.00554559	4.23101
	1	iː ɖ	1.45297e-05	-0.439535
	1	iː e	6.75777e-06	-0.446098
	1	iː e̞	0.0002097	-0.274729
	1	iː ɛ̝	9.39196e-06	-0.443873
	1	iː ɛː	4.80682e-06	-0.447745
	1	iː f	0.000177747	-0.30171
	1	iː ɡ	0.000790105	0.215378
	1	iː h	7.30461e-05	-0.390122
	1	iː ɧ	7.46513e-06	-0.4455
	1	iː ɪ	4.80682e-06	-0.447745
	1	iː ʝ	2.06974e-05	-0.434327
	1	iː k	0.00193985	1.18625
	1	iː l	0.00280072	1.91318
	1	iː ɭ	2.18737e-05	-0.433333
	1	iː m	0.000513324	-0.0183419
	1	iː ɱ	0.000137104	-0.336031
	1	iː n	0.00226468	1.46054
	1	iː ɳ	1.69607e-05	-0.437482
	1	iː ŋ	0.000250716	-0.240094
	1	iː ɵ	8.44256e-06	-0.444675
	1	iː p	0.000393413	-0.119598
	1	iː r	0.000617752	0.0698395
	1	iː s	0.00173415	1.01255
	1	iː ʂ	3.06667e-05	-0.425908
	1	iː t	0.0022465	1.44519
	1	iː ʈ	1.59323e-05	-0.43835
	1	iː u	1.46785e-05	-0.439409
	1	iː ʊ	0.000677399	0.120207
	1	iː uː	3.19981e-05	-0.424784
	1	iː v	0.00173049	1.00946
	1	iː yː	6.04694e-06	-0.446698
	1	iː øː	1.69303e-06	-0.450374
	1	ʝ a	0.0001473	-0.327421
	1	ʝ ɑː	2.31663e-05	-0.432242
	1	ʝ a͡uː	6.28173e-06	-0.4465
	1	ʝ ɔ	0.000183617	-0.296754
	1	ʝ d	1.20624e-05	-0.441618
	1	ʝ e	4.7731e-05	-0.411499
	1	ʝ e̞	1.74033e-05	-0.437108
	1	ʝ eː	1.67774e-05	-0.437637
	1	ʝ ɛ	1.23347e-05	-0.441388
	1	ʝ ɛ̝	0.00162878	0.923575
	1	ʝ ɛː	0.000620103	0.0718245
	1	ʝ i	5.96575e-06	-0.446766
	1	ʝ ɪ	0.000121069	-0.34957
	1	ʝ iː	1.56671e-05	-0.438574
	1	ʝ l	8.57228e-06	-0.444565
	1	ʝ o	4.5181e-06	-0.447989
	1	ʝ ɵ	9.1602e-05	-0.374453
	1	ʝ oː	4.64224e-05	-0.412604
	1	ʝ u	5.3102e-06	-0.44732
	1	ʝ ʉ	6.1712e-06	-0.446593
	1	ʝ ʊ	3.07489e-05	-0.425839
	1	ʝ uː	0.000161172	-0.315707
	1	ʝ ʉː	0.000819768	0.240426
	1	ʝ ʏ	9.25307e-05	-0.373669
	1	ʝ ø	1.60236e-05	-0.438273
	1	ʝ ø̞	0.000767652	0.196418
	1	ʝ øː	0.000541631	0.00556094
	1	ʝː a	7.75945e-05	-0.386282
	1	ʝː d	0.000101545	-0.366057
	1	ʝː e̞	3.24944e-05	-0.424365
	1	ʝː ɛ̝	1.91469e-06	-0.450187
	1	ʝː f	8.87182e-06	-0.444312
	1	ʝː ɡ	2.82288e-06	-0.44942
	1	ʝː k	1.03451e-05	-0.443068
	1	ʝː l	3.79482e-05	-0.41976
	1	ʝː m	1.23675e-05	-0.441361
	1	ʝː n	5.16399e-05	-0.408198
	1	ʝː ɳ	9.83299e-06	-0.443501
	1	ʝː r	1.38489e-05	-0.44011
	1	ʝː s	3.1456e-05	-0.425242
	1	ʝː ʂ	5.96106e-06	-0.44677
	1	ʝː t	2.56756e-06	-0.449636
	1	ʝː ʊ	5.35655e-06	-0.447281
	1	ʝː v	3.69091e-05	-0.420637
	1	k a	0.00311152	2.17563
	1	k ɑ	2.21255e-05	-0.433121
	1	k ɑː	0.00135332	0.69097
	1	k a͡uː	0.000124833	-0.346392
	1	k b	7.61461e-05	-0.387505
	1	k ɔ	0.00119188	0.554647
	1	k ɕ	7.03393e-06	-0.445864
	1	k d	3.17877e-05	-0.424962
	1	k e̞	0.000646451	0.0940733
	1	k eː	2.56189e-05	-0.430171
	1	k ɛ̝	0.000116729	-0.353235
	1	k f	1.11041e-05	-0.442427
	1	k ɡ	1.06818e-06	-0.450902
	1	k h	1.41986e-05	-0.439814
	1	k ɧ	0.000276023	-0.218724
	1	k ɪ	0.000297074	-0.200948
	1	k iː	9.58936e-06	-0.443707
	1	k l	0.000400608	-0.113522
	1	k m	1.44964e-05	-0.439563
	1	k n	9.49385e-05	-0.371636
	1	k o	1.84464e-05	-0.436227
	1	k ɵ	0.00120759	0.567908
	1	k oː	0.000718427	0.154851
	1	k p	2.99704e-05	-0.426496
	1	k r	0.00396746	2.89841
	1	k s	0.00363747	2.61975
	1	k t	0.000593919	0.0497141
	1	k u	1.94883e-05	-0.435348
	1	k ʉ	0.000274669	-0.219868
	1	k ʉ̞	4.22949e-05	-0.416089
	1	k ʊ	0.00155907	0.864705
	1	k uː	0.00223828	1.43825
	1	k ʉː	0.000325412	-0.177019
	1	k v	0.000731053	0.165513
	1	k yː	1.5498e-05	-0.438717
	1	k øː	2.08663e-06	-0.450042
	1	kː a	5.38193e-06	-0.447259
	1	kː ɔ	6.59065e-05	-0.396151
	1	kː ɕ	3.84207e-05	-0.419361
	1	kː e̞	0.000237633	-0.251141
	1	kː h	3.01433e-06	-0.449259
	1	kː ʝ	4.27272e-06	-0.448196
	1	kː l	8.58831e-05	-0.379282
	1	kː n	3.41379e-05	-0.422977
	1	kː ɵ	4.58515e-06	-0.447932
	1	kː r	5.21237e-05	-0.40779
	1	kː s	0.00120773	0.568034
	1	kː t	0.000871322	0.283959
	1	kː ʉ	6.18742e-06	-0.446579
	1	kː v	1.35518e-05	-0.440361
	1	l a	0.00811472	6.40044
	1	l ɑ	7.85313e-05	-0.385491
	1	ɭ a	0.000123956	-0.347133
	1	l ɑː	0.00341874	2.43505
	1	ɭ ɑː	8.09642e-05	-0.383436
	1	l a͡u	5.31955e-05	-0.406885
	1	l a͡uː	8.44891e-05	-0.38046
	1	l b	0.00035446	-0.152491
	1	l ɔ	0.00256372	1.71306
	1	l ɕ	3.93837e-05	-0.418548
	1	ɭ ɔ	6.00296e-05	-0.401114
	1	l d	0.000135239	-0.337605
	1	l e	2.04674e-05	-0.434521
	1	l e̞	0.00138739	0.719741
	1	ɭ e	4.58515e-06	-0.447932
	1	ɭ e̞	1.06291e-05	-0.442829
	1	l eː	0.00143255	0.757873
	1	ɭ eː	9.94976e-06	-0.443402
	1	l e͡ʉː	2.3083e-06	-0.449855
	1	l ɛ	4.6684e-05	-0.412383
	1	l ɛ̝	0.00331862	2.35051
	1	ɭ ɛ̝	1.92688e-05	-0.435533
	1	l ɛː	0.00148691	0.803778
	1	l f	0.000167691	-0.310202
	1	l ɡ	9.60701e-05	-0.37068
	1	l h	6.35909e-05	-0.398106
	1	l ɧ	6.65531e-05	-0.395605
	1	l i	6.48914e-05	-0.397008
	1	l ɪ	0.0039854	2.91355
	1	ɭ ɪ	0.000110264	-0.358695
	1	l iː	0.00200101	1.23789
	1	ɭ iː	3.51697e-06	-0.448834
	1	l ʝ	6.15204e-05	-0.399855
	1	l k	0.000582673	0.0402175
	1	l m	0.000122625	-0.348257
	1	l n	0.000113332	-0.356104
	1	l o	2.98045e-05	-0.426636
	1	l ɵ	0.00232489	1.51138
	1	ɭ o	4.27272e-06	-0.448196
	1	ɭ ɵ	4.14181e-06	-0.448307
	1	l oː	0.00197008	1.21177
	1	ɭ oː	1.14756e-05	-0.442114
	1	l p	0.000137123	-0.336014
	1	l r	0.000144948	-0.329407
	1	l s	0.000262398	-0.23023
	1	l t	0.000419587	-0.0974955
	1	l u	4.27272e-06	-0.448196
	1	l ʉ	0.000407044	-0.108087
	1	l ʉ̞	0.000158925	-0.317604
	1	l ʊ	0.00108855	0.467395
	1	ɭ ʊ	3.10165e-06	-0.449185
	1	l uː	0.00201258	1.24766
	1	l ʉː	0.00174543	1.02208
	1	l v	0.000188082	-0.292984
	1	l y	4.44466e-06	-0.448051
	1	l ʏ	0.00125725	0.609848
	1	l yː	0.00204816	1.2777
	1	ɭ yː	1.3806e-06	-0.450638
	1	l ø	4.69266e-05	-0.412178
	1	l ø̞	0.000749964	0.181482
	1	ɭ ø	4.74902e-06	-0.447794
	1	ɭ ø̞	1.10068e-05	-0.44251
	1	l øː	0.00085144	0.267171
	1	lː a	0.000212322	-0.272514
	1	lː b	0.00016965	-0.308548
	1	lː ɔ	3.86049e-05	-0.419205
	1	lː ɕ	1.49661e-05	-0.439166
	1	lː d	0.00117915	0.543895
	1	lː e̞	0.000299231	-0.199127
	1	lː e͡ʉ	6.49984e-06	-0.446315
	1	lː ɛː	1.03717e-05	-0.443046
	1	lː f	0.000241344	-0.248008
	1	lː ɡ	7.63324e-05	-0.387347
	1	lː h	2.26448e-05	-0.432682
	1	lː ɧ	5.12921e-06	-0.447473
	1	lː ɪ	0.000163841	-0.313453
	1	lː ʝ	0.00113512	0.506718
	1	lː k	0.000136162	-0.336826
	1	lː m	0.00070082	0.139984
	1	lː n	1.40959e-05	-0.439901
	1	lː o	2.3083e-06	-0.449855
	1	lː oː	1.39051e-05	-0.440062
	1	lː p	0.000164005	-0.313315
	1	lː r	7.94181e-05	-0.384742
	1	lː s	0.000763527	0.192934
	1	lː t	0.00053413	-0.000772722
	1	lː u	5.06492e-05	-0.409035
	1	lː ʊ	6.6169e-06	-0.446217
	1	lː uː	1.23362e-05	-0.441387
	1	lː v	0.00078901	0.214454
	1	lː ʏ	1.61182e-05	-0.438193
	1	lː ø	7.77347e-06	-0.44524
	1	m a	0.000881395	0.292465
	1	m ɑː	0.000710363	0.148041
	1	m b	0.000623022	0.0742892
	1	m ɔ	0.000190131	-0.291254
	1	m e	5.71234e-05	-0.403568
	1	m e̞	0.000276706	-0.218147
	1	m eː	0.000374032	-0.135963
	1	m ɛ	2.13636e-06	-0.45
	1	m ɛ̝	0.000673824	0.117188
	1	m ɛː	7.55329e-05	-0.388022
	1	m f	9.15214e-05	-0.374521
	1	ɱ f	0.00134426	0.683322
	1	m ɡ	2.67045e-06	-0.449549
	1	m h	5.27417e-05	-0.407268
	1	m ɪ	0.00106911	0.450974
	1	m iː	0.000394726	-0.118489
	1	m k	8.17969e-05	-0.382733
	1	m l	1.93013e-05	-0.435506
	1	m n	3.81569e-05	-0.419583
	1	m o	1.86547e-05	-0.436052
	1	m ɵ	0.00048885	-0.0390088
	1	m oː	0.00217624	1.38586
	1	m p	0.00112916	0.501682
	1	m r	3.2953e-06	-0.449021
	1	m s	6.14409e-06	-0.446616
	1	m t	5.29438e-06	-0.447333
	1	m u	6.15049e-05	-0.399868
	1	m ʉ	0.000117008	-0.353
	1	m ʊ	0.000264164	-0.228738
	1	m uː	0.00013028	-0.341793
	1	m ʉː	0.00017412	-0.304773
	1	ɱ v	0.000900458	0.308562
	1	m y	6.11598e-06	-0.44664
	1	m ʏ	0.000178919	-0.300721
	1	m yː	0.000162078	-0.314941
	1	m ø̞	0.000283551	-0.212367
	1	m øː	0.000266517	-0.226751
	1	mː a	0.000184955	-0.295624
	1	mː b	0.00159423	0.8944
	1	mː ɔ	6.87405e-05	-0.393758
	1	mː ɕ	3.8997e-05	-0.418874
	1	mː d	0.000212838	-0.272079
	1	mː e̞	4.82425e-05	-0.411067
	1	mː ɛ̝	1.92833e-05	-0.435521
	1	mː f	0.000301451	-0.197252
	1	ɱː f	0.00131599	0.659446
	1	mː ɡ	9.34001e-05	-0.372935
	1	mː h	0.000102898	-0.364915
	1	mː ɧ	6.74942e-05	-0.39481
	1	mː ɪ	7.4503e-05	-0.388892
	1	mː ʝ	0.000244042	-0.24573
	1	mː k	0.000231849	-0.256026
	1	mː l	0.000140129	-0.333476
	1	mː n	0.000296528	-0.201409
	1	mː oː	2.55416e-05	-0.430236
	1	mː p	0.000734298	0.168254
	1	mː r	0.000229366	-0.258123
	1	mː s	0.000936038	0.338607
	1	mː t	0.000243557	-0.246139
[truncated: 21,150 more rows]
